# Supplementary material for: Pancreatic cancer intrinsic PI3Kα activity accelerates metastasis and rewires macrophage component
Source: PubMed Central journal article supplement (PMC8261517; doi:10.15252/emmm.202013502), 2021-05-25
Supplement: EMMM-13-e13502-s002.pdf [file EMMM-13-e13502-s002.pdf]

## **Appendix**

### **Table of contents**

**Appendix Figure S1:** PI3K $\alpha$  activation signature

**Appendix Figure S2:** Additional data on cohorts

**Appendix Figure S3:** All data related to western Blot of Akt

**Appendix Figure S4:** All data relating to migration assays

**Appendix Figure S5:** All data relating to cytotoxicity assays

**Appendix Figure S6:** GI30 and IC30 for cytotoxicity and migration experiments

**Appendix Figure S7:** HPNE hTERT cell cytotoxicity and migration experiments

**Appendix Figure S8:** PIP and PIP<sub>2</sub> sub-types

**Appendix Figure S9:** Correlations between cellular phenotypes and class I PI3K isoform inhibition

**Appendix Figure S10:** Additional information on cfDNA in KPC mice

**Appendix Figure S11:** Description of the KPC cohort

**Appendix Figure S12:** Tumour progression by US imaging

**Appendix Figure S13:** Effects of PI3K $\alpha$  pharmacological inhibition on cfDNA and metastasis

**Appendix Figure S14:** Cancer staging and tumour histology of KPC mice treated with the vehicle and BYL-719

**Appendix Figure S15:** Secondary effects of PI3K $\alpha$  pharmacological inhibition

**Appendix Figure S16:** Pharmacological inactivation of PI3K $\alpha$  reverses pre-cancer lesions and alterations of their stromal environment in an oncogenic KRAS context

**Appendix Figure S17:** Murine cell lines derived for the study

**Appendix Figure S18:** Effects of PI3K $\alpha$  inhibition on the immune response

**Appendix additional Methods**

**Appendix supplemental references**

**A**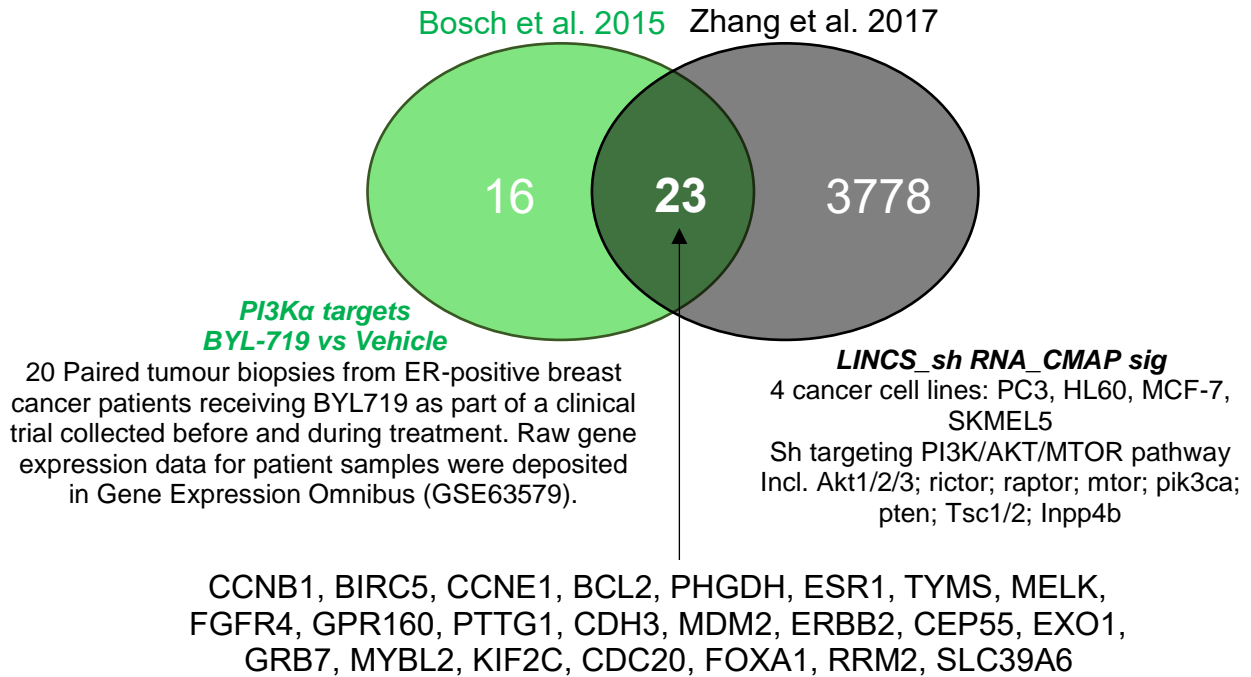**B**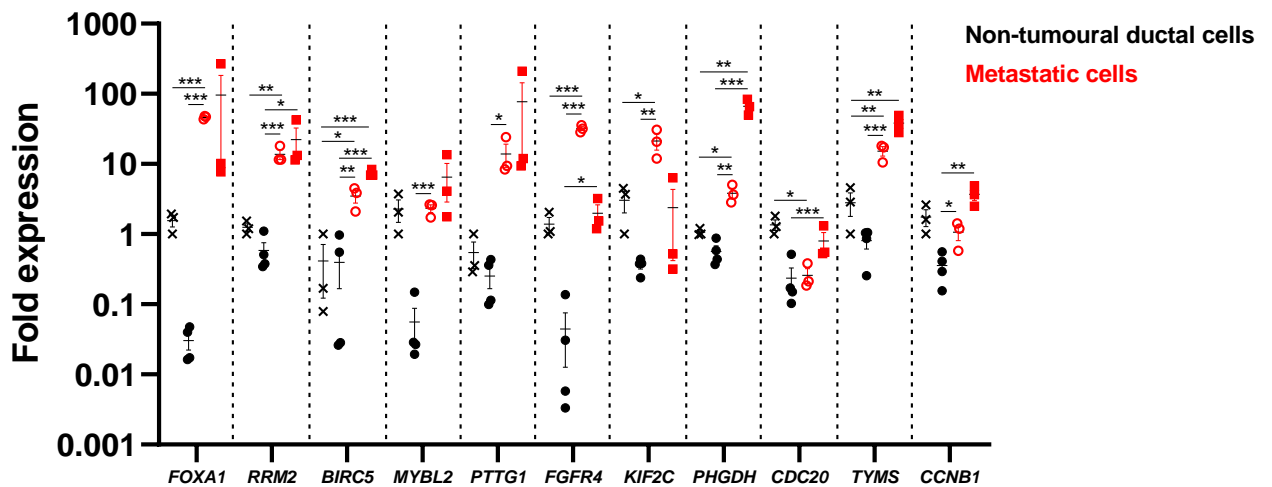**C**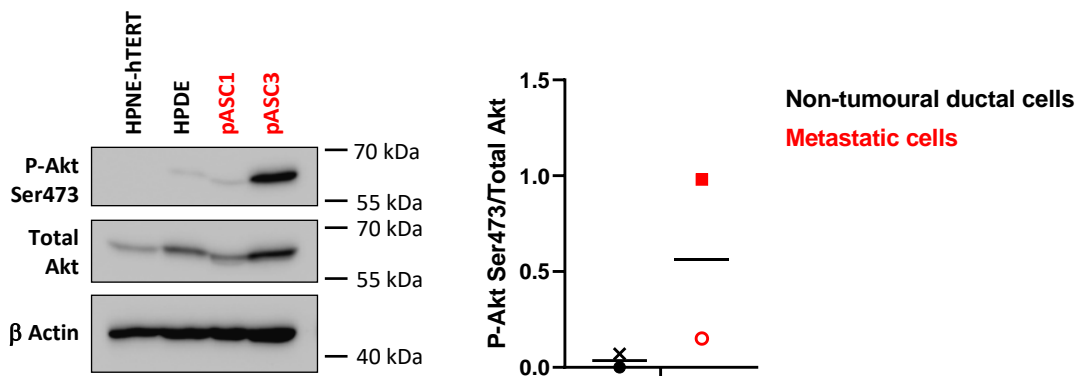

**Appendix Figure S1: PI3K $\alpha$  activation signature.** **A**, Identification of a PI3K $\alpha$  activation signature by overlapping two distinct signatures identified by Bosch *et al.* 2015 and Zhang *et al.* 2017. **B**, Expression of *FOXA1*, *RRM2*, *BIRC5*, *MYBL2*, *PTTG1*, *FGFR4*, *KIF2C*, *PHGDH*, *CDC20*, *TYMS*, *CCNB1* (genes from PI3K $\alpha$  signature) was tested by RT-qPCR in non-tumoural ductal cells (cross: HPNE hTERT, circles: HPDE) and peritoneal metastatic cells isolated from patients (empty circles: pASC1, square: pASC3). Independent replicates with the mean are represented and gene expression is relative to one replicate of AsPC-1 cells. \*  $p < 0.05$ , \*\*  $p < 0.01$ , \*\*\*  $p < 0.001$ ,  $n \geq 3$ , Student's t-test. **C**, Protein levels of P-Akt (Ser473), total Akt and  $\beta$  Actin were observed by western blot and P-Akt Ser473/total Akt was represented in non-tumoural ductal cells (cross: HPNE hTERT, circles: HPDE) and peritoneal metastatic cells isolated from patients (empty circles: pASC1, square: pASC3).



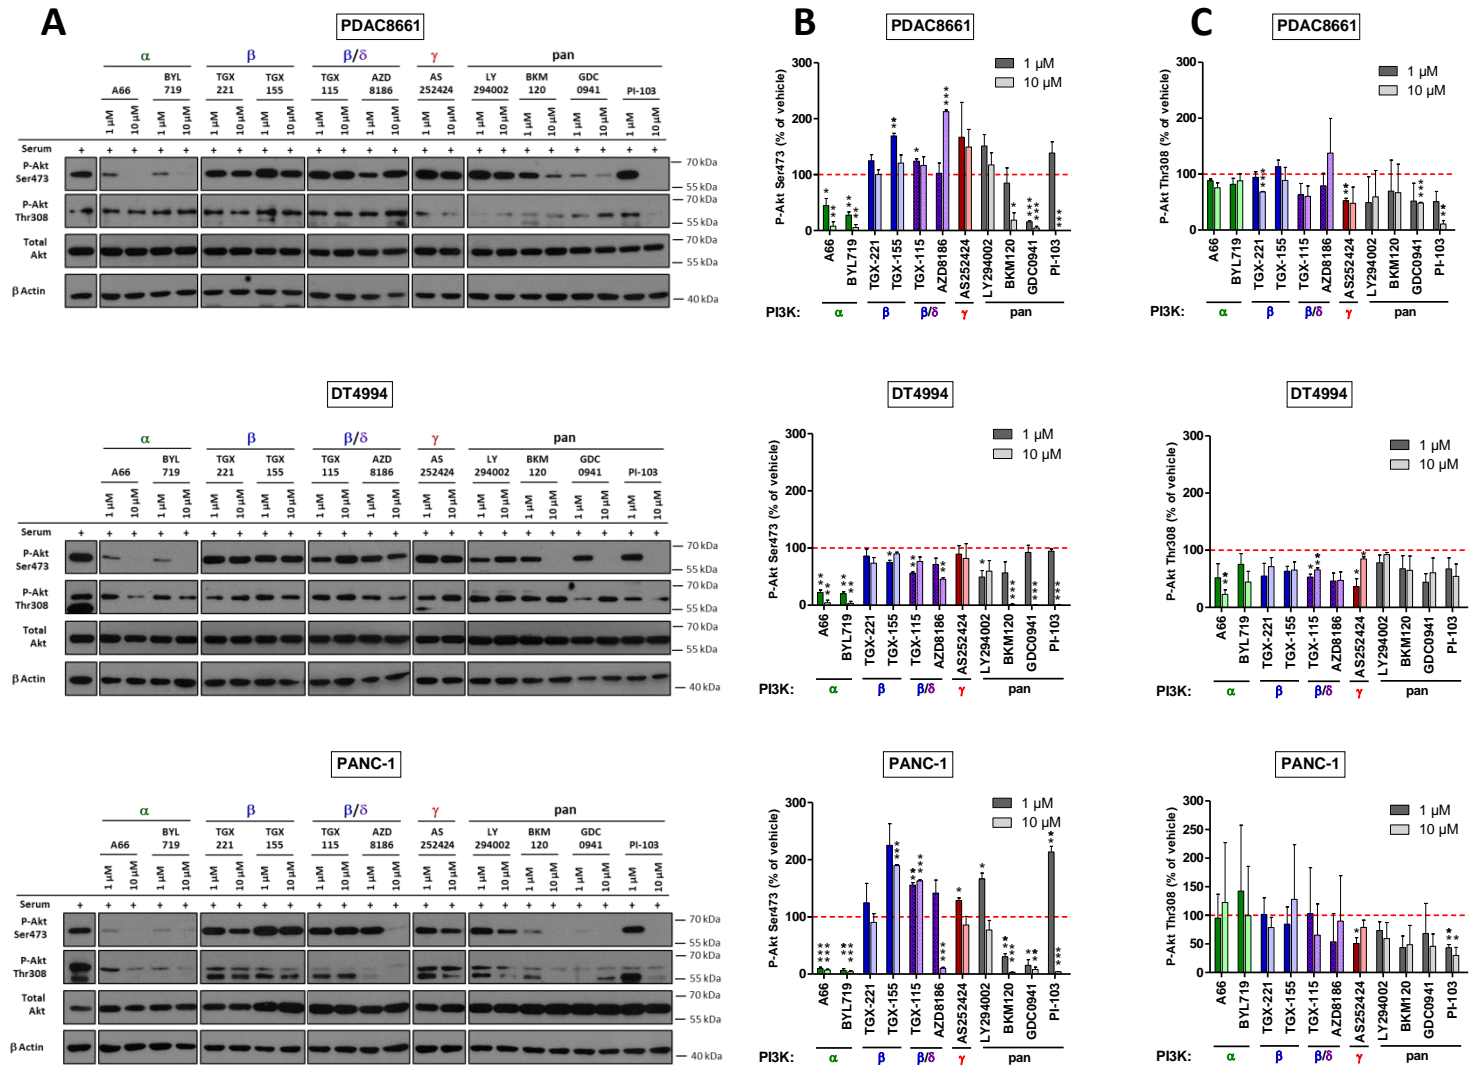

**Appendix Figure S3: All data related to western Blot of Akt. A,** Murine (PDAC8661, DT4994) and human (PANC-1) pancreatic tumours cells were treated for 15min with  $\alpha$ ,  $\beta$ ,  $\beta/\delta$ ,  $\gamma$ -selective or pan-PI3K inhibitors at 0.1 or 1  $\mu$ M in the presence of 10% FBS and the protein levels of P-Akt (Ser473 and Thr308), total Akt and  $\beta$  Actin were observed by western blot. P-Akt on **B**, Ser473 or **C**, Thr308 was quantified and normalised with  $\beta$  Actin.

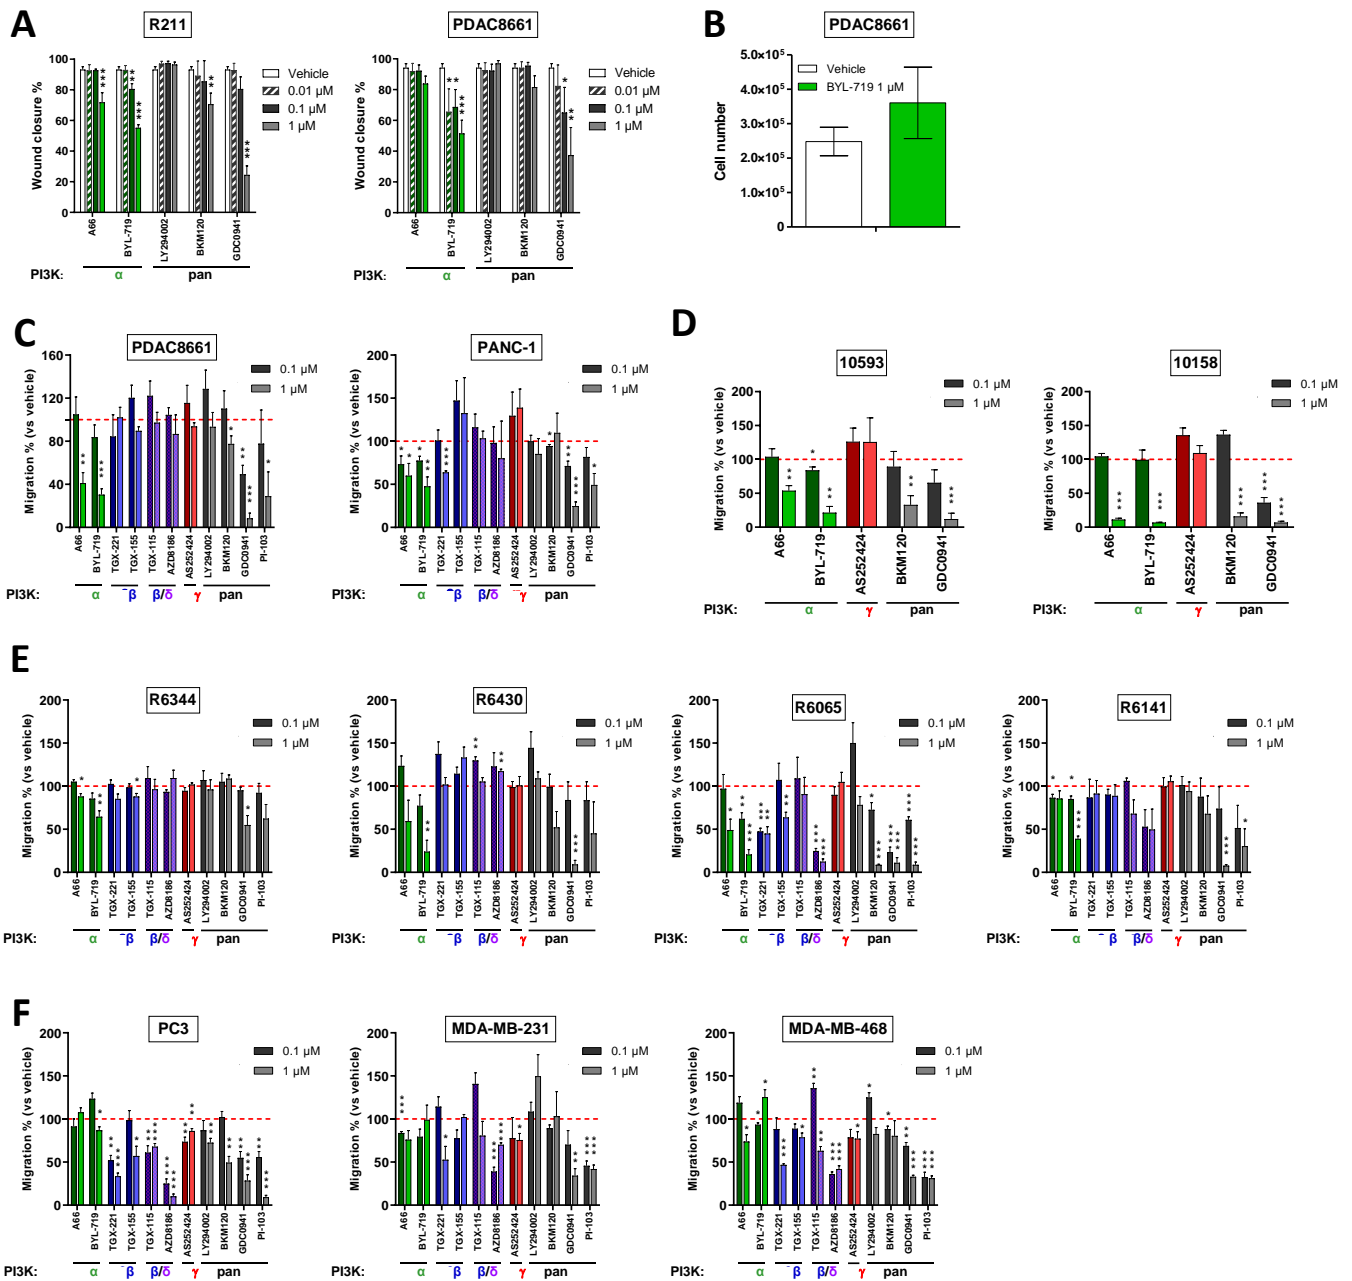

**Appendix Figure S4: All data relating to migration assays.** **A**, Scratching was applied to a monolayer of murine pancreatic tumour cells R211 or PDAC8661. The cells were treated concomitantly with  $\alpha$ -selective or pan-PI3K inhibitors at 0.01, 0.1 or 1  $\mu$ M and observed after 24 h to determine the number of wounds that had healed. **B**, murine pancreatic cells PDAC8661, whether or not treated with BYL-719 at 1  $\mu$ M were counted 24 h after wound healing assay. **C**, Murine (PDAC8661) and human (PANC-1) pancreatic tumour cells were treated with  $\alpha$ ,  $\beta$ ,  $\beta/\delta$ ,  $\gamma$ -selective or pan-PI3K inhibitors at 0.1 or 1  $\mu$ M. **D**, KRAS<sup>wt</sup>/PIK3CA<sup>mt</sup> murine pancreatic tumour cells 10593 and 10158 were treated with  $\alpha$ ,  $\gamma$ -selective or pan-PI3K inhibitors at 0.1 or 1  $\mu$ M. **E**, Murine pancreatic tumour cells (R6344, R6430, R6065, R6141) were treated with  $\alpha$ ,  $\beta$ ,  $\beta/\delta$ ,  $\gamma$ -selective or pan-PI3K inhibitors at 0.1 or 1  $\mu$ M. **F**, Prostate (PC3) and breast cancer cells (MDA-MB-231, MDA-MB-468) were treated with  $\alpha$ ,  $\beta$ ,  $\beta/\delta$ ,  $\gamma$ -selective or pan-PI3K inhibitors at 0.1 or 1  $\mu$ M. **C-F**, Cells were concomitantly subjected to a Boyden chamber migration assay and migrating cells were quantified after 24h. Mean  $\pm$  SEM (\*  $p < 0.05$ , \*\*  $p < 0.01$ , \*\*\*  $p < 0.001$ ,  $n \geq 3$ , Student's t-test).

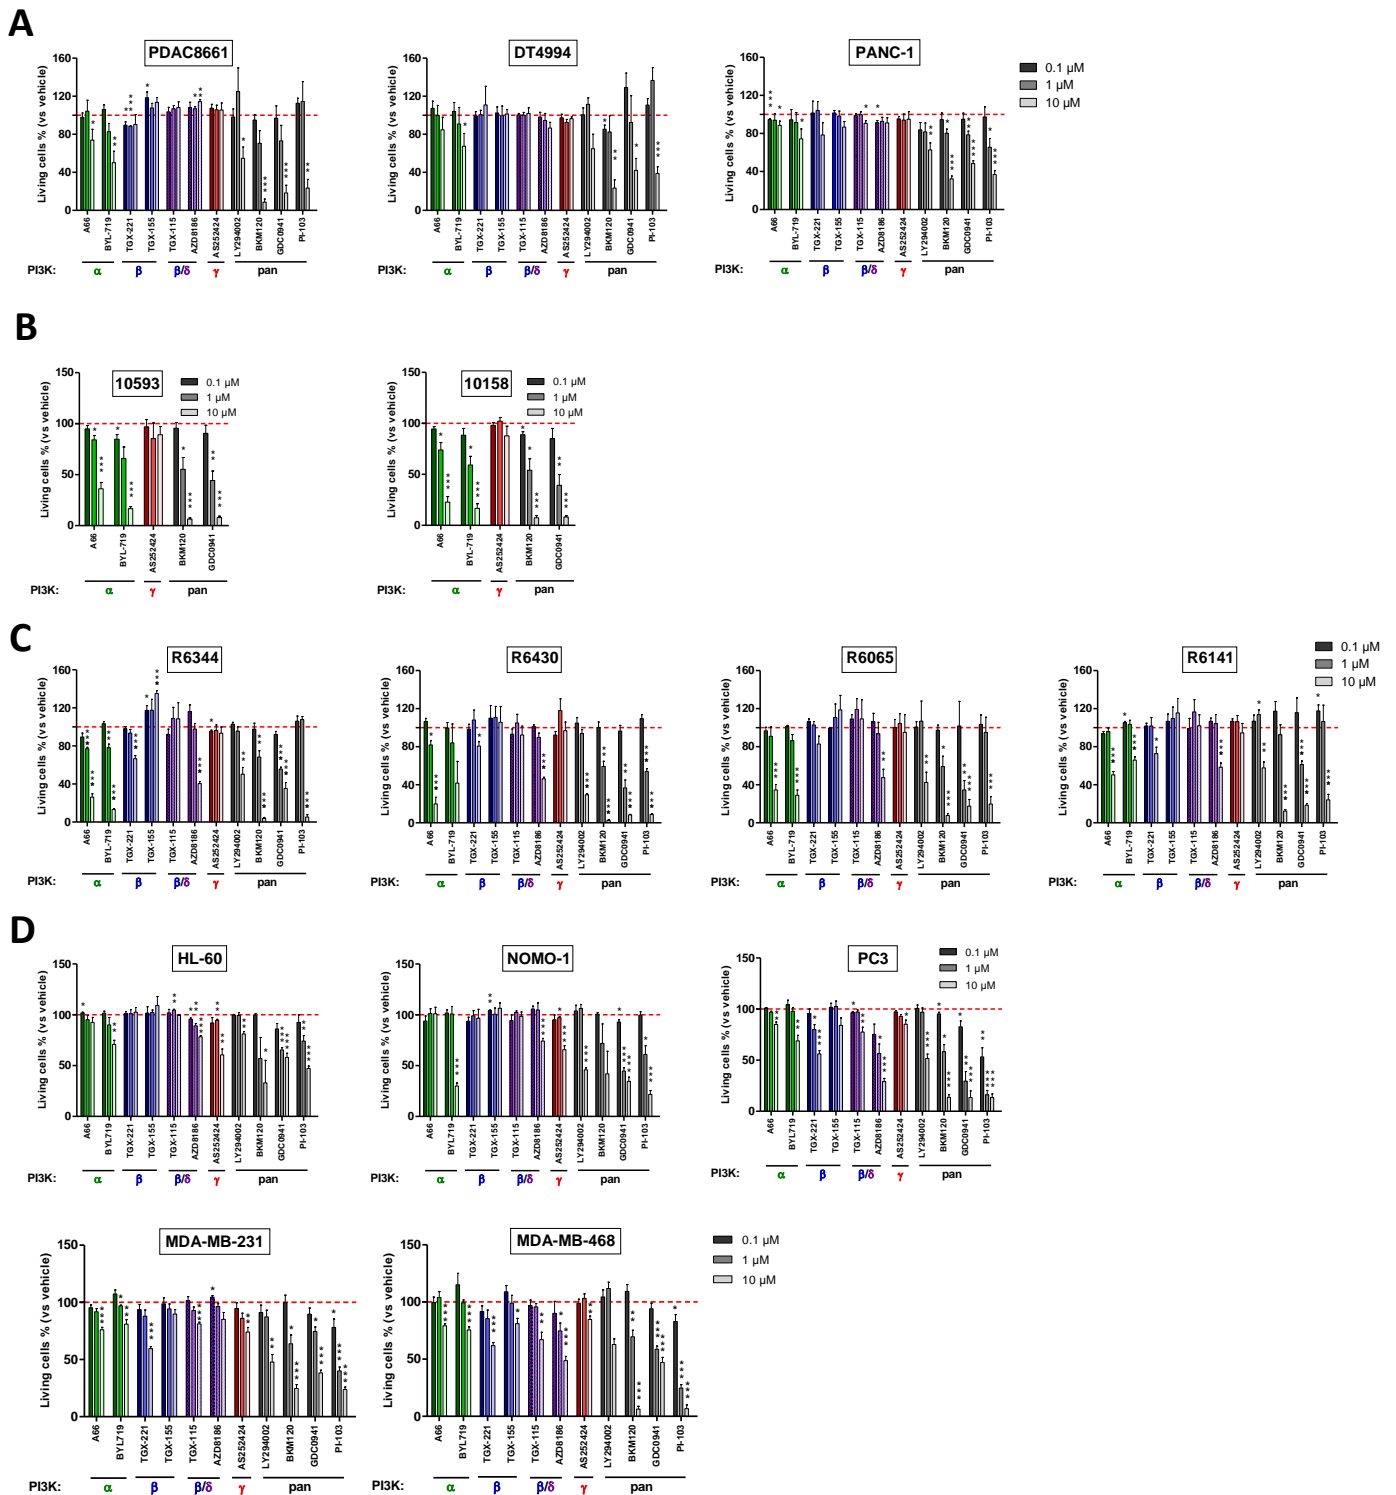

**Appendix Figure S5: All data relating to cytotoxicity assays. A**, Murine (PDAC8661, PDAC8661, DT4994) and human (PANC-1) pancreatic tumour cells were treated with  $\alpha$ ,  $\beta$ ,  $\beta/\delta$ ,  $\gamma$ -selective or pan-PI3K inhibitors for 3 days. **B**, KRAS<sup>wt</sup>/PIK3CA<sup>mt</sup> murine pancreatic tumour cells 10593 and 10158 were treated with  $\alpha$ ,  $\gamma$ -selective or pan-PI3K inhibitors. **C**, Murine pancreatic tumour cells (R6344, R6430, R6065, R6141) were treated with  $\alpha$ ,  $\beta$ ,  $\beta/\delta$ ,  $\gamma$ -selective or pan-PI3K inhibitors. **D**, Acute myeloid leukaemia (HL-60, NOMO-1), prostate (PC3) and breast cancer cells (MDA-MB-231, MDA-MB-468) were treated with  $\alpha$ ,  $\beta$ ,  $\beta/\delta$ ,  $\gamma$ -selective or pan-PI3K inhibitors. **A-D**, Living cells were quantified after 3 days with a MTT colorimetric assay and metabolically active cells are considered as living cells. Mean  $\pm$  SEM (\*  $p < 0.05$ , \*\*  $p < 0.01$ , \*\*\*  $p < 0.001$ ,  $n \geq 3$ , Student's t-test).

**A**

|              |            | Cytotoxicity - Growth GI30 (μM) |         |         |         |         |          |          |        |         |        |       |
|--------------|------------|---------------------------------|---------|---------|---------|---------|----------|----------|--------|---------|--------|-------|
| Cell line    | A66        | BYL-719                         | TGX-221 | TGX-155 | TGX-115 | AZD8186 | AS252424 | LY294002 | BKM120 | GDC0941 | PI-103 |       |
|              | α          |                                 | β       |         | β/δ     |         | γ        | pan      |        |         |        |       |
| Pancreas     | R211       | NR                              | 5.804   | NR      | NR      | NR      | NR       | NR       | 2.097  | 1.307   | 1.699  | 1.878 |
|              | PDAC8661   | NR                              | 1.867   | NR      | NR      | NR      | NR       | NR       | 9.575  | 1.022   | 1.127  | 6.389 |
|              | DT4994     | NR                              | 6.082   | NR      | NR      | NR      | NR       | NR       | 9.096  | 2.370   | 2.043  | 8.421 |
|              | PANC-1     | NR                              | NR      | NR      | NR      | NR      | NR       | NR       | 4.15   | 1.638   | 1.654  | 0.818 |
|              | 10593      | 2.017                           | 0.8107  | -       | -       | -       | -        | NR       | -      | 0.615   | 0.410  | -     |
|              | 10158      | 1.182                           | 0.6293  | -       | -       | -       | -        | NR       | -      | 0.545   | 0.312  | -     |
|              | R6344      | 1.443                           | 1.311   | 6.663   | NR      | NR      | 2.662    | NR       | 3.556  | 0.944   | 0.501  | 6.288 |
|              | R6430      | 1.487                           | 1.955   | NR      | NR      | NR      | 2.617    | NR       | 2.471  | 0.723   | 0.359  | 0.646 |
|              | R6065      | 2.787                           | 1.928   | NR      | NR      | NR      | 2.887    | NR       | 8.330  | 0.701   | 0.331  | 2.528 |
|              | R6141      | 7.519                           | 7.608   | NR      | NR      | NR      | 5.753    | NR       | 8.477  | 1.845   | 0.782  | 2.965 |
| Other organs | PC3        | NR                              | 8.671   | 2.005   | NR      | NR      | 0.3351   | NR       | 4.203  | 0.660   | 0.217  | 0.058 |
|              | MDA-MB-231 | NR                              | NR      | 3.832   | NR      | NR      | NR       | NR       | 3.163  | 0.794   | 1.296  | 0.217 |
|              | MDA-MB-468 | NR                              | NR      | 3.800   | NR      | 7.790   | 1.365    | NR       | 8.549  | 0.989   | 0.513  | 0.206 |
|              | NOMO-1     | NR                              | 4.291   | NR      | NR      | NR      | NR       | 8.741    | 7.341  | 1.096   | 0.319  | 0.727 |
|              | HL-60      | NR                              | NR      | NR      | NR      | NR      | NR       | 8.326    | NR     | 0.583   | 0.629  | 1.284 |

|           |            | Cytotoxicity - Growth GI30 (μM) |         |         |         |         |          |          |        |         |        |       |
|-----------|------------|---------------------------------|---------|---------|---------|---------|----------|----------|--------|---------|--------|-------|
| Cell line | A66        | BYL-719                         | TGX-221 | TGX-155 | TGX-115 | AZD8186 | AS252424 | LY294002 | BKM120 | GDC0941 | PI-103 |       |
|           | α          |                                 | β       |         | β/δ     |         | γ        | pan      |        |         |        |       |
| Pancreas  | HPNE hTERT | 3.644                           | 4.141   | NR      | NR      | NR      | NR       | NR       | 8.801  | 1.174   | 0.541  | 1.366 |

NR = not reached  
 - = non-available

**B**

|            |              | Migration - Inhibitory IC30 (μM) |         |         |         |         |          |          |        |         |        |       |       |
|------------|--------------|----------------------------------|---------|---------|---------|---------|----------|----------|--------|---------|--------|-------|-------|
| Cell line  | A66          | BYL-719                          | TGX-221 | TGX-155 | TGX-115 | AZD8186 | AS252424 | LY294002 | BKM120 | GDC0941 | PI-103 |       |       |
|            | α            |                                  | β       |         | β/δ     |         | γ        | pan      |        |         |        |       |       |
| Pancreas   | R211         | 0.045                            | 0.044   | NR      | NR      | NR      | NR       | NR       | NR     | NR      | 0.035  | 0.151 |       |
|            | PDAC8661     | 0.814                            | 0.177   | NR      | NR      | NR      | NR       | NR       | NR     | NR      | 0.053  | 0.137 |       |
|            | PANC-1       | 0.133                            | 0.148   | 0.8217  | NR      | NR      | NR       | NR       | NR     | NR      | 0.105  | 0.187 |       |
|            | 10593        | 0.854                            | 0.171   | -       | -       | -       | -        | NR       | -      | 0.511   | 0.033  | -     |       |
|            | 10158        | 0.694                            | 0.417   | -       | -       | -       | -        | NR       | -      | 0.918   | 0.038  | -     |       |
|            | R6344        | NR                               | 0.375   | NR      | NR      | NR      | NR       | NR       | NR     | NR      | 0.416  | 0.463 |       |
|            | R6430        | 0.986                            | 0.132   | NR      | NR      | NR      | NR       | NR       | NR     | 0.536   | 0.163  | 0.198 |       |
|            | R6065        | 0.421                            | 0.076   | 0.028   | 0.846   | NR      | 0.026    | NR       | NR     | 0.109   | 0.026  | 0.075 |       |
|            | R6141        | NR                               | 0.198   | NR      | NR      | 0.941   | 0.033    | NR       | NR     | NR      | 0.604  | 0.114 | 0.048 |
|            | Other organs | PC3                              | NR      | NR      | 0.048   | 0.548   | 0.014    | 0.028    | NR     | NR      | 0.743  | 0.056 | 0.064 |
| MDA-MB-231 |              | NR                               | NR      | 0.861   | NR      | NR      | 0.013    | NR       | NR     | NR      | 0.101  | 0.030 |       |
| MDA-MB-468 |              | NR                               | NR      | 0.252   | NR      | 0.963   | 0.012    | NR       | NR     | NR      | 0.095  | 0.021 |       |

|           |            | Migration - Inhibitory IC30 (μM) |         |         |         |         |          |          |        |         |        |       |
|-----------|------------|----------------------------------|---------|---------|---------|---------|----------|----------|--------|---------|--------|-------|
| Cell line | A66        | BYL-719                          | TGX-221 | TGX-155 | TGX-115 | AZD8186 | AS252424 | LY294002 | BKM120 | GDC0941 | PI-103 |       |
|           | α          |                                  | β       |         | β/δ     |         | γ        | pan      |        |         |        |       |
| Pancreas  | HPNE hTERT | 0.989                            | NR      | NR      | NR      | NR      | 0.921    | NR       | NR     | NR      | 0.244  | 0.148 |

NR = not reached  
 - = non-available

**Appendix Figure S6: GI30 and IC30 for cytotoxicity and migration experiments. A**, Pancreatic cancer (R211, PDAC8661, DT4994, PANC-1, 10593, 10158, R6344, R6430, R6065, R6141), pancreatic untransformed (HPNE hTERT), prostate cancer (PC3), breast cancer cells (MDA-MB-231, MDA-MB-468) and acute myeloid leukaemia cells (NOMO-1, HL-60) were treated with 0.1, 1 or 10 μM of α, β, β/δ, γ-specific or pan-PI3K inhibitors and living cells were quantified after 3 days with a MTT colorimetric assay. GI30 (for the concentration that inhibited 30% of cell growth) was determined with GraphPad Prism 8 using log (inhibitor) vs. response - variable slope (four parameters) analysis. “-” indicates that the inhibitor was not used in the corresponding cell line, “NR” indicates that the GI30 was not reached. **B**, Pancreatic cancer (R211, PDAC8661, DT4994, PANC-1, 10593, 10158, R6344, R6430, R6065, R6141), pancreatic untransformed (HPNE hTERT), prostate cancer (PC3) and breast cancer cells (MDA-MB-231, MDA-MB-468) were treated with 0.1 or 1 μM of α, β, β/δ, γ-specific or pan-PI3K inhibitors and concomitantly subjected to a Boyden chamber migration assay. Migrating cells were quantified after 24h. CI30 (for the concentration that inhibited 30% of cell migration) was determined with GraphPad Prism 8 using log (inhibitor) vs. response - variable slope (four parameters) analysis. “-” indicates that the inhibitor was not used in the corresponding cell line, “NR” indicates that the GI30 was not reached. Mean +/- SEM (\* p<0.05, \*\* p<0.01, \*\*\* p<0.001, n≥3, Student’s t-test).



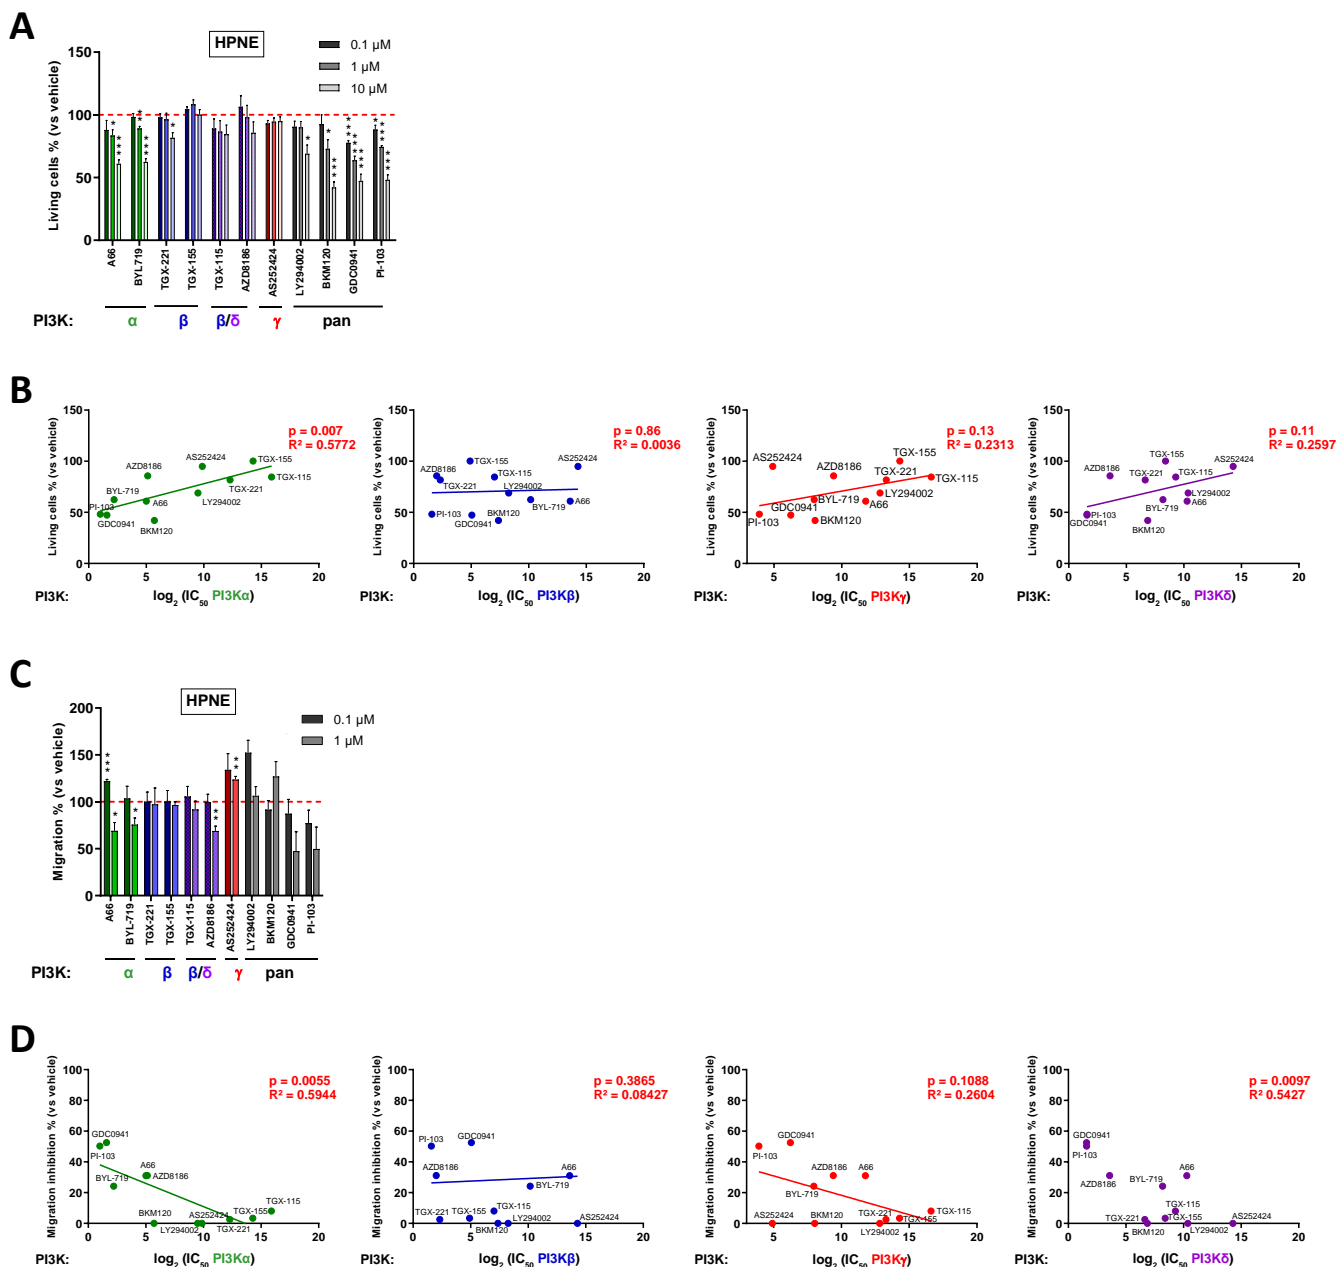

**Appendix Figure S7: HPNE hTERT cell cytotoxicity and migration experiments.** **A**, Ductal pancreatic cells HPNE hTERT were treated with  $\alpha$ ,  $\beta$ ,  $\beta/\delta$ ,  $\gamma$ -specific or pan-PI3K inhibitors and living cells were quantified after 3 days with a MTT colorimetric assay. Metabolically active cells are considered as living cells. **B**, Cytotoxic capacities of PI3K inhibitors at 1  $\mu$ M were tested on HPNE hTERT cells and were plotted against the in vitro IC<sub>50</sub> for each class I PI3K of each inhibitor determined on recombinant proteins. Pearson correlation tests were performed. **C**, HPNE hTERT cells were treated with  $\alpha$ ,  $\beta$ ,  $\beta/\delta$ ,  $\gamma$ -specific or pan-PI3K inhibitors at 0.1 or 1  $\mu$ M and concomitantly subjected to a Boyden chamber migration assay. Migrating cells were quantified after 24 h. **D**, Migration inhibition capacities of PI3K inhibitors at 1  $\mu$ M were tested on HPNE hTERT cells and were plotted against the in vitro IC<sub>50</sub> for each class I PI3K of each inhibitor determined on recombinant proteins. Pearson correlation tests were performed. Mean  $\pm$  SEM (\*  $p < 0.05$ , \*\*  $p < 0.01$ , \*\*\*  $p < 0.001$ ,  $n \geq 3$ , Student's t-test).

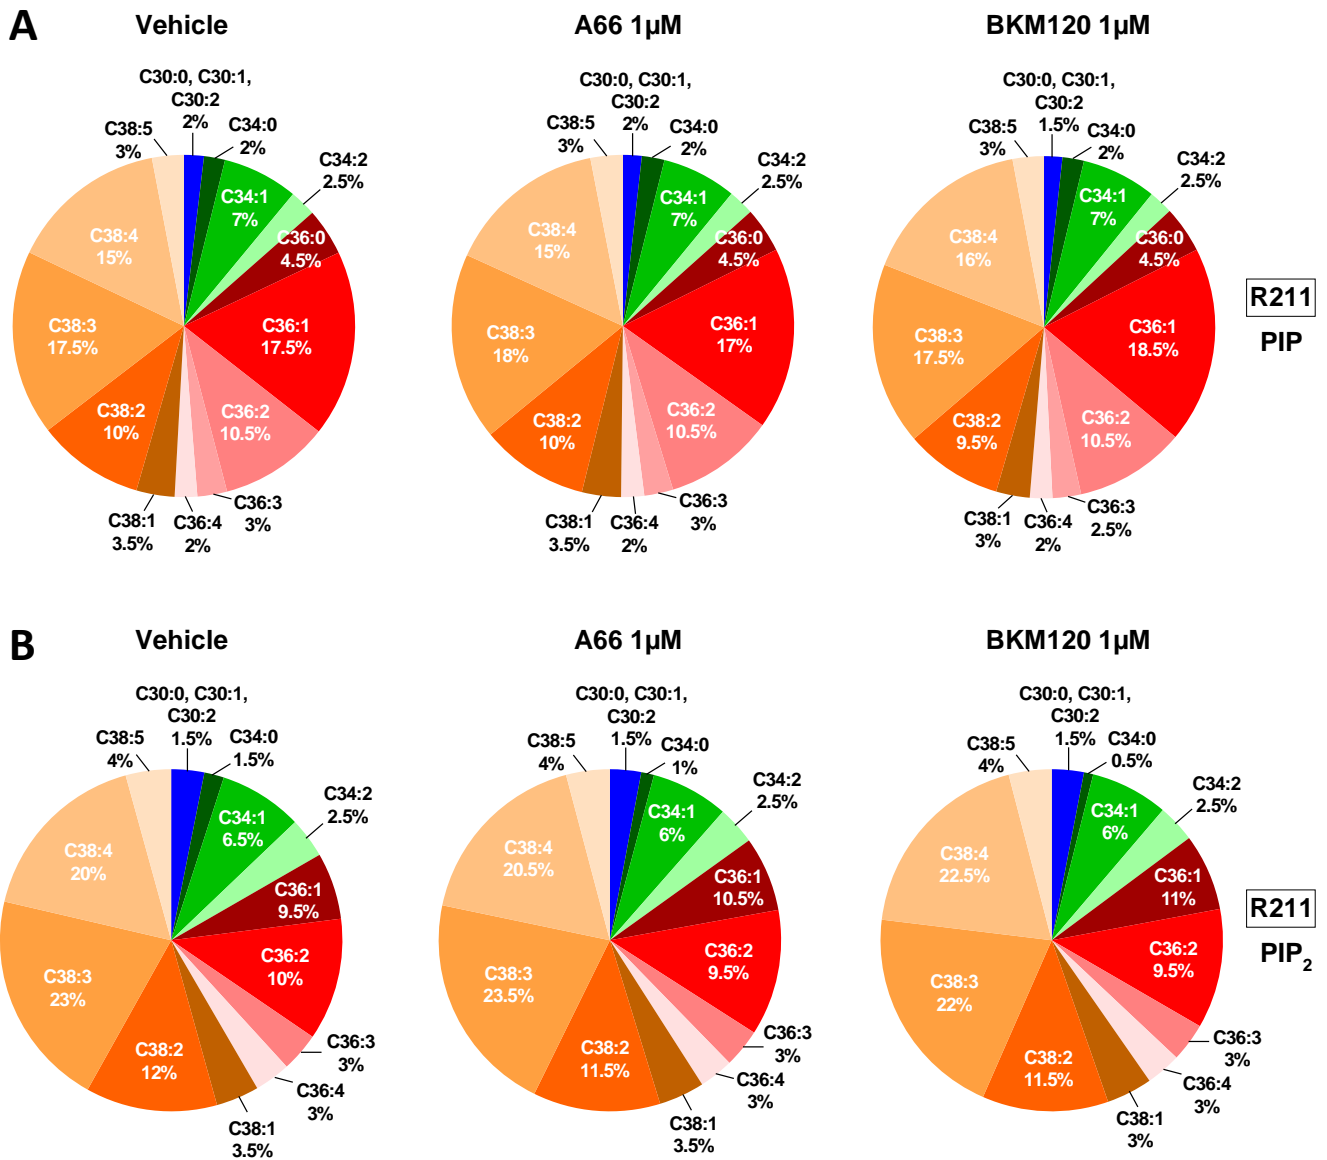

**Appendix Figure S8: PIP and PIP<sub>2</sub> sub-types.** Murine pancreatic tumour cells R211 are treated for 15 min with the vehicle (0.01% DMSO) or  $\alpha$ -specific A66 or pan-PI3K inhibitor BKM120 at 1 $\mu$ M. Phospholipids were extracted and the proportion of each **A**, PIP and **B**, PIP<sub>2</sub> subtype was represented. N=3

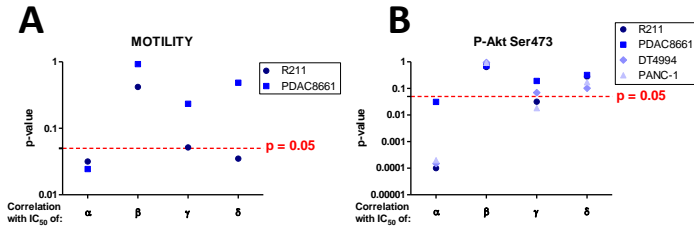

**C** Migration correlation - R squared

|            |              | PI3K $\alpha$ | PI3K $\beta$ | PI3K $\gamma$ | PI3K $\delta$ |
|------------|--------------|---------------|--------------|---------------|---------------|
| Pancreas   | R211         | 0.6707        | 0.01982      | 0.2436        | 0.1686        |
|            | PDAC8661     | 0.7075        | 0.0005708    | 0.3281        | 0.2799        |
|            | PANC-1       | 0.5336        | 0.0397       | 0.1811        | 0.3739        |
|            | 10593        | 0.8969        | 0.6883       | 0.04761       | 0.8156        |
|            | 10158        | 0.792         | 0.3554       | 0.354         | 0.5543        |
|            | R6344        | 0.388         | 0.06159      | 0.1963        | 0.3665        |
|            | R6430        | 0.6669        | 0.001815     | 0.3333        | 0.2532        |
|            | R6065        | 0.6097        | 0.2529       | 0.2354        | 0.6925        |
|            | R6141        | 0.5217        | 0.1696       | 0.2579        | 0.6677        |
|            | Other organs | PC3           | 0.06767      | 0.8464        | 0.07215       |
| MDA-MB-231 |              | 0.1328        | 0.1938       | 0.1641        | 0.3925        |
| MDA-MB-468 |              | 0.05677       | 0.4916       | 0.05836       | 0.5726        |

**D** Cytotoxicity correlation - R squared

|              |            | PI3K $\alpha$ | PI3K $\beta$ | PI3K $\gamma$ | PI3K $\delta$ |
|--------------|------------|---------------|--------------|---------------|---------------|
| Pancreas     | R211       | 0.3917        | 0.01859      | 0.2506        | 0.2026        |
|              | PDAC8661   | 0.5084        | 0.01331      | 0.3061        | 0.2586        |
|              | DT4994     | 0.5554        | 0.02876      | 0.3779        | 0.2945        |
|              | PANC-1     | 0.3131        | 0.1128       | 0.2374        | 0.3323        |
|              | 10593      | 0.7159        | 0.6617       | 0.113         | 0.7343        |
|              | 10158      | 0.7154        | 0.527        | 0.2357        | 0.6636        |
|              | R6344      | 0.7754        | 0.01008      | 0.3046        | 0.2667        |
|              | R6430      | 0.6886        | 0.007813     | 0.238         | 0.2871        |
|              | R6065      | 0.7842        | 0.005775     | 0.3083        | 0.2899        |
|              | R6141      | 0.6351        | 0.0555       | 0.3203        | 0.4164        |
| Other organs | PC3        | 0.3739        | 0.3731       | 0.2671        | 0.6739        |
|              | MDA-MB-231 | 0.2255        | 0.07722      | 0.2499        | 0.2245        |
|              | MDA-MB-468 | 0.2327        | 0.2938       | 0.2018        | 0.4658        |
|              | NOMO-1     | 0.5756        | 0.006474     | 0.5803        | 0.169         |
|              | HL-60      | 0.4795        | 0.001741     | 0.7097        | 0.09689       |

**E** Motility correlation - R squared

|          |          | PI3K $\alpha$ | PI3K $\beta$ | PI3K $\gamma$ | PI3K $\delta$ |
|----------|----------|---------------|--------------|---------------|---------------|
| Pancreas | R211     | 0.8291        | 0.2247       | 0.7671        | 0.8178        |
|          | PDAC8661 | 0.8556        | 0.003624     | 0.4237        | 0.174         |

**F** p-Akt Ser473 correlation - R squared

|          |          | PI3K $\alpha$ | PI3K $\beta$ | PI3K $\gamma$ | PI3K $\delta$ |
|----------|----------|---------------|--------------|---------------|---------------|
| Pancreas | R211     | 0.8288        | 0.02511      | 0.4175        | 0.1272        |
|          | PDAC8661 | 0.4189        | 0.01634      | 0.1822        | 0.109         |
|          | DT4994   | 0.8141        | 0.0004657    | 0.3192        | 0.2686        |
|          | PANC-1   | 0.8671        | 0.001017     | 0.4797        | 0.1964        |

**G**

|             |                     | R211 | DT4994     | A260  | 10158 | A338  | PDAC8661 | R6065 | A94L  | 10593       | R6430 | R6141 | A338L | R6344 |  |  |
|-------------|---------------------|------|------------|-------|-------|-------|----------|-------|-------|-------------|-------|-------|-------|-------|--|--|
| Epithelial  | E-cadherin          | 0.00 | -0.39      | -0.42 | -0.19 | -0.62 | -0.30    | 0.30  | -0.39 | -0.17       | -0.49 | -0.74 | -4.91 | -4.08 |  |  |
|             | CK19                | 0.00 | -1.15      | -0.66 | -0.75 | -1.08 | -0.58    | -0.39 | -0.71 | -0.33       | -0.64 | -0.93 | -3.26 | -3.80 |  |  |
|             | CK7                 | 0.00 | -0.52      | -1.20 | -2.25 | -2.83 | -0.18    | 0.12  | 0.13  | -1.81       | -1.44 | -1.36 | -1.93 | -3.26 |  |  |
|             | Collagen IV alpha 1 | 0.00 | -0.20      | -0.30 | -0.59 | -0.22 | -0.24    | -0.06 | -0.36 | 0.32        | 0.04  | -0.07 | -0.11 | 0.28  |  |  |
|             | Desmoglein-3        | 0.00 | 0.35       | 0.05  | 0.42  | -0.17 | -0.92    | -0.33 | -0.78 | 0.84        | -0.39 | 0.36  | 0.21  | -1.17 |  |  |
|             | MUC-1               | 0.00 | -1.28      | -1.46 | -1.65 | -1.60 | -0.70    | -1.03 | -0.96 | -0.72       | -1.73 | -1.85 | -2.31 | -2.92 |  |  |
| Mesenchymal | Syndecan-1          | 0.00 | -0.56      | -0.15 | -0.65 | -0.70 | -0.29    | 0.19  | -0.24 | -0.06       | -0.45 | -0.08 | -1.33 | -0.72 |  |  |
|             | S100A4              | 0.00 | 0.01       | -1.61 | -0.97 | -0.30 | -0.37    | -1.22 | -0.69 | -0.46       | -0.34 | -0.59 | 0.25  | 0.52  |  |  |
|             | FN1                 | 0.00 | -0.80      | -0.68 | -1.36 | -0.66 | -0.55    | -0.20 | -1.59 | -0.60       | -0.54 | 0.34  | -0.47 | -0.07 |  |  |
|             | Snail               | 0.00 | -1.13      | -1.73 | -0.92 | -1.07 | -1.00    | -0.46 | -1.18 | 0.51        | -0.23 | -0.12 | 0.60  | 0.49  |  |  |
|             | Twist               | 0.00 | -0.19      | -0.94 | -0.79 | -1.69 | -0.33    | -0.26 | 0.36  | -0.13       | -0.13 | 0.30  | 0.16  | 0.14  |  |  |
|             | Col1A1              | 0.00 | -2.23      | -2.26 | -1.54 | -0.92 | -1.43    | -1.30 | 0.27  | 1.88        | 1.99  | -0.85 | 2.16  | 1.85  |  |  |
|             | Alpha-SMA (Acta2)   | 0.00 | -2.78      | -3.18 | -1.84 | -1.85 | -1.08    | -0.19 | -0.51 | 0.63        | 1.85  | 1.77  | 2.16  | 1.97  |  |  |
|             | Vimentin            | 0.00 | -0.52      | -0.18 | -0.59 | -0.34 | -0.31    | -0.16 | -0.44 | 0.00        | -0.27 | -0.16 | -0.26 | -0.47 |  |  |
|             | Subtype             |      | Epithelial |       |       |       |          |       |       | Mesenchymal |       |       |       |       |  |  |

Relative expression (Log 10)

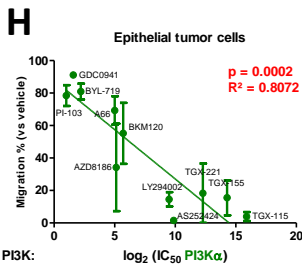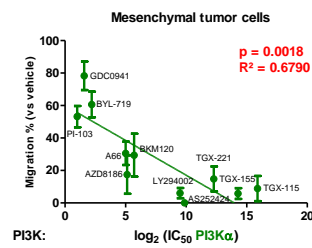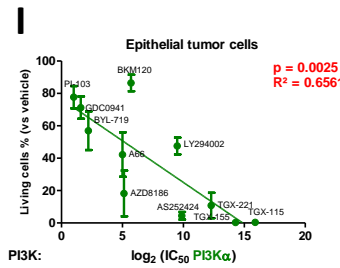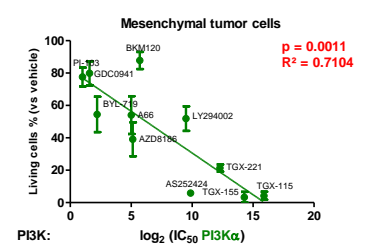

**Appendix Figure S9: Correlations between cellular phenotypes and class I PI3K isoform inhibition.**

Inhibitory capacities of PI3K inhibitors at 1  $\mu$ M on motility and at 10  $\mu$ M on Akt phosphorylation (Ser473) were plotted against the in vitro IC<sub>50</sub> for each class I PI3K ( $\alpha$ ,  $\beta$ ,  $\gamma$  and  $\delta$ ) of each inhibitor determined on recombinant proteins. Pearson correlation tests were performed. The p-value obtained was represented for each tested cell line and for each class I PI3K isoform for **A**, motility and **B**, Akt phosphorylation on Ser473. The dotted red line corresponds to a p-value of 0.05. Individual R squared values of the Pearson correlation test for each cell line (from the pancreas or other organs) and each PI3K isoform are shown for **C**, migration, **D**, cytotoxicity, **E**, motility and **F**, Akt phosphorylation on Ser473. **G**, The expression of epithelial and mesenchymal markers was assessed by RT-qPCR in all pancreatic murine tumour cells and represented as log<sub>10</sub> of fold expression, with R211 being the reference cell line. **H**, Migration inhibition or **I**, cytotoxic capacities of PI3K inhibitors at 1 and 10  $\mu$ M respectively were tested on epithelial or mesenchymal pancreatic murine tumour cells. The mean of these values was plotted against the in vitro IC<sub>50</sub> for PI3K $\alpha$  and each inhibitor. IC<sub>50</sub> is determined on recombinant proteins. Pearson correlation tests were performed and p-values were presented. Mean  $\pm$  SEM (\* p<0.05, \*\* p<0.01, \*\*\* p<0.001, n $\geq$ 3, Student's t-test).

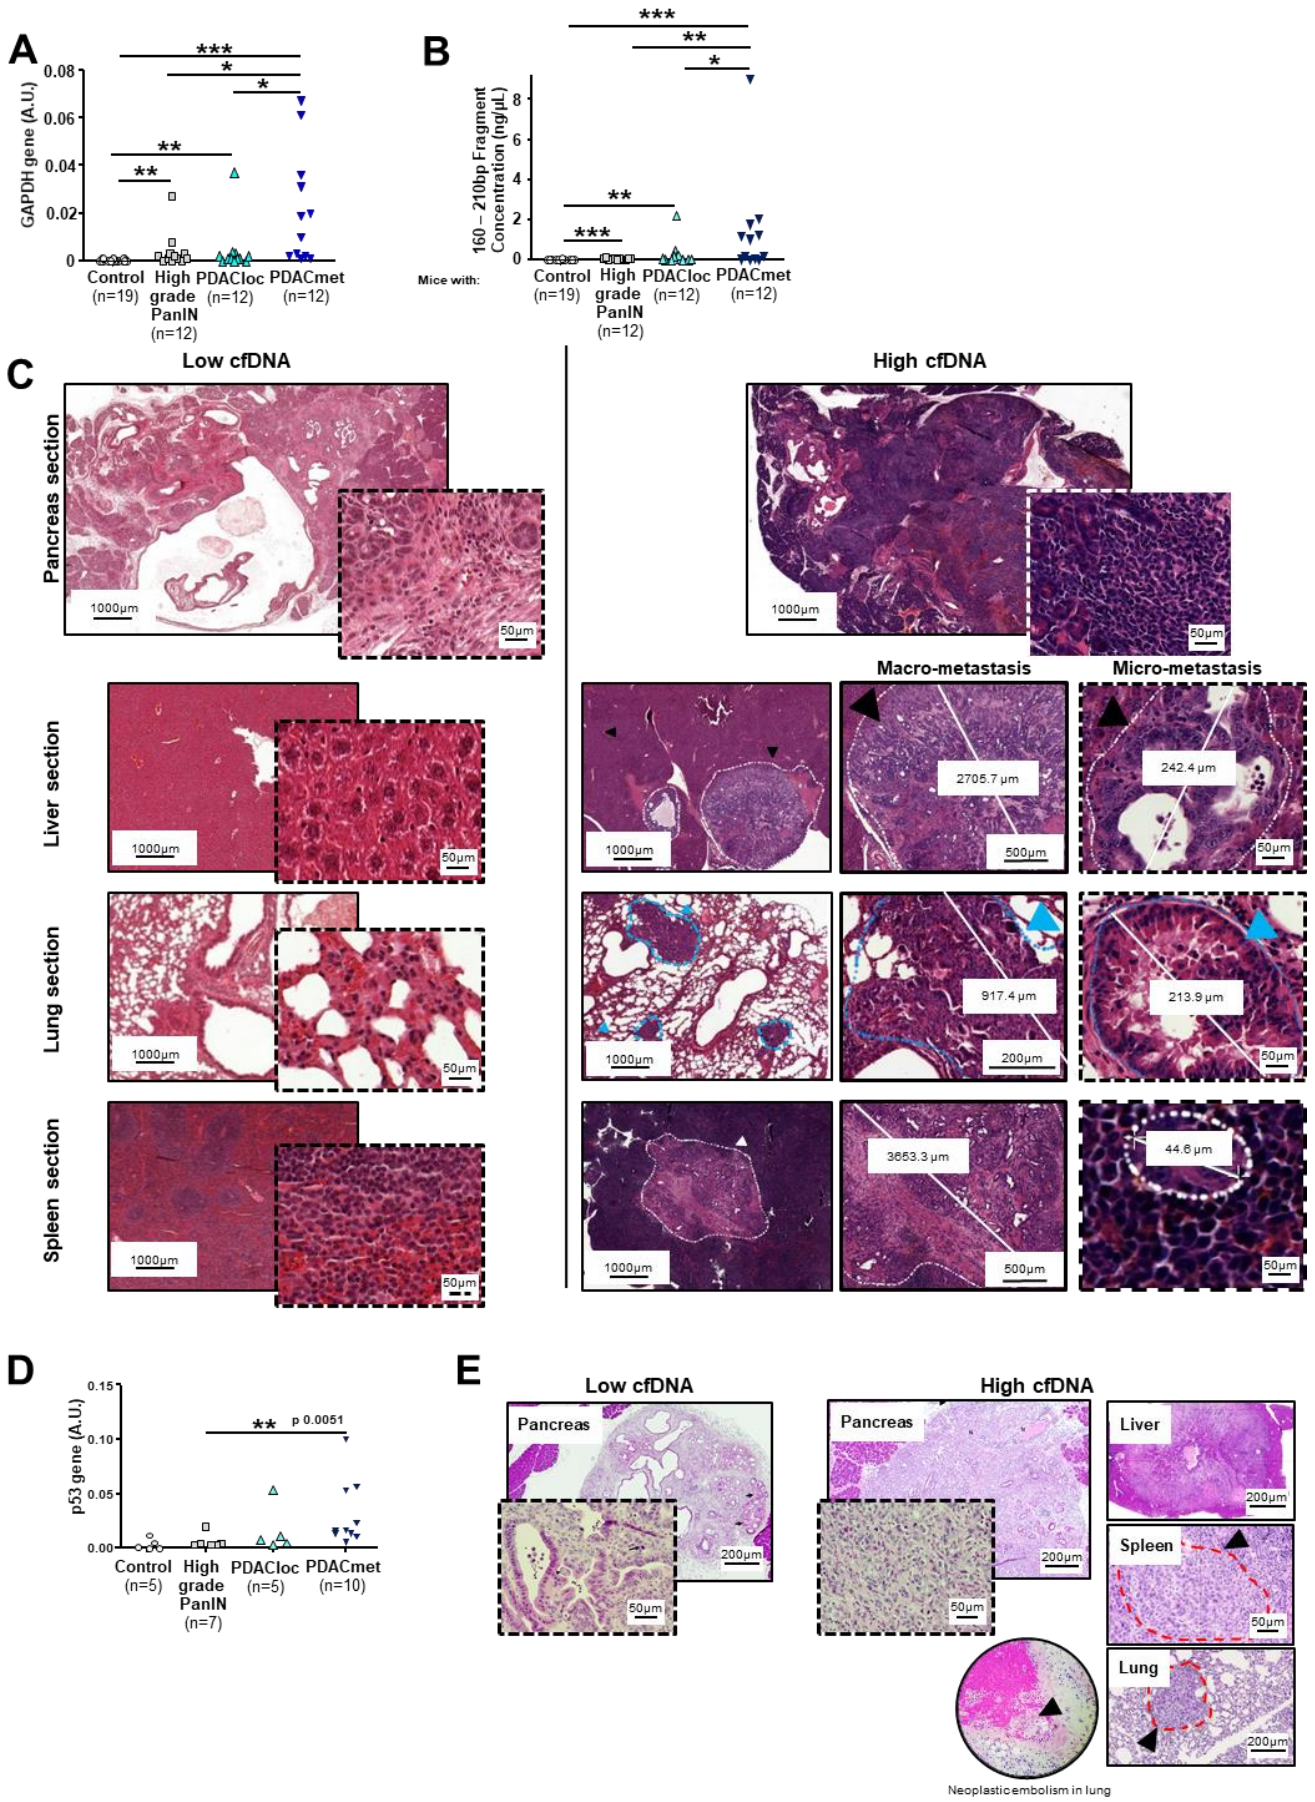

**Appendix Figure S10: Additional information on cfDNA in KPC mice.** **A**, Quantification of cfDNA by GAPDH gene in KPC mice at different stages of the disease. **B**, Quantification of 160-210bp Fragment concentration in KPC mice at different stages of the disease. N in each group is indicated. **C**, Representative images of KPC mice with low and high levels of cfDNA. **D**, Quantification of cfDNA and **E**, representative images of KPC mice originating from another animal house (CRCM Marseille). N is indicated.

**A**

| Enrolment criteria for KPC mice |                |
|---------------------------------|----------------|
| Detected tumour by US imaging   |                |
| Tumour location                 | Head or tail   |
| Increased cfDNA*                |                |
| Weight                          | > 22g          |
| Sex                             | Male or female |

**B**

| Mouse ID | Sex | Age (weeks) | Initial weight (g) | cfDNA (Fold increase) | Tumour location | Treatment |
|----------|-----|-------------|--------------------|-----------------------|-----------------|-----------|
| 637      | M   | 35          | 25.6               | 2.333                 | Head            | BYL-719   |
| 715      | M   | 32          | 27.3               | 4.000                 | Head            | BYL-719   |
| 773      | F   | 29          | 25.2               | 1.000                 | Head            | BYL-719   |
| 785      | M   | 30          | 32.5               | 0.500                 | Tail            | BYL-719   |
| 871      | M   | 24          | 36.3               | 0.750                 | Tail            | BYL-719   |
| 897      | M   | 21          | 36.1               | 5.750                 | Head            | BYL-719   |
| 790      | M   | 32          | 28                 | 1.500                 | Tail            | Vehicle   |
| 795      | F   | 33          | 24.7               | 1.667                 | Head            | Vehicle   |
| 860      | M   | 23          | 30.4               | 0.222                 | Head            | Vehicle   |
| 894      | M   | 25          | 32                 | 3.500                 | Tail            | Vehicle   |
| 939      | F   | 18          | 22.3               | 2.167                 | Head            | Vehicle   |
| 977      | M   | 20          | 30.9               | 6.333                 | Tail            | Vehicle   |

**Appendix Figure S11: Description of the KPC cohort. A,** Enrolment criteria for KPC mice included in the study. **B,** Detailed description of KPC study mice.

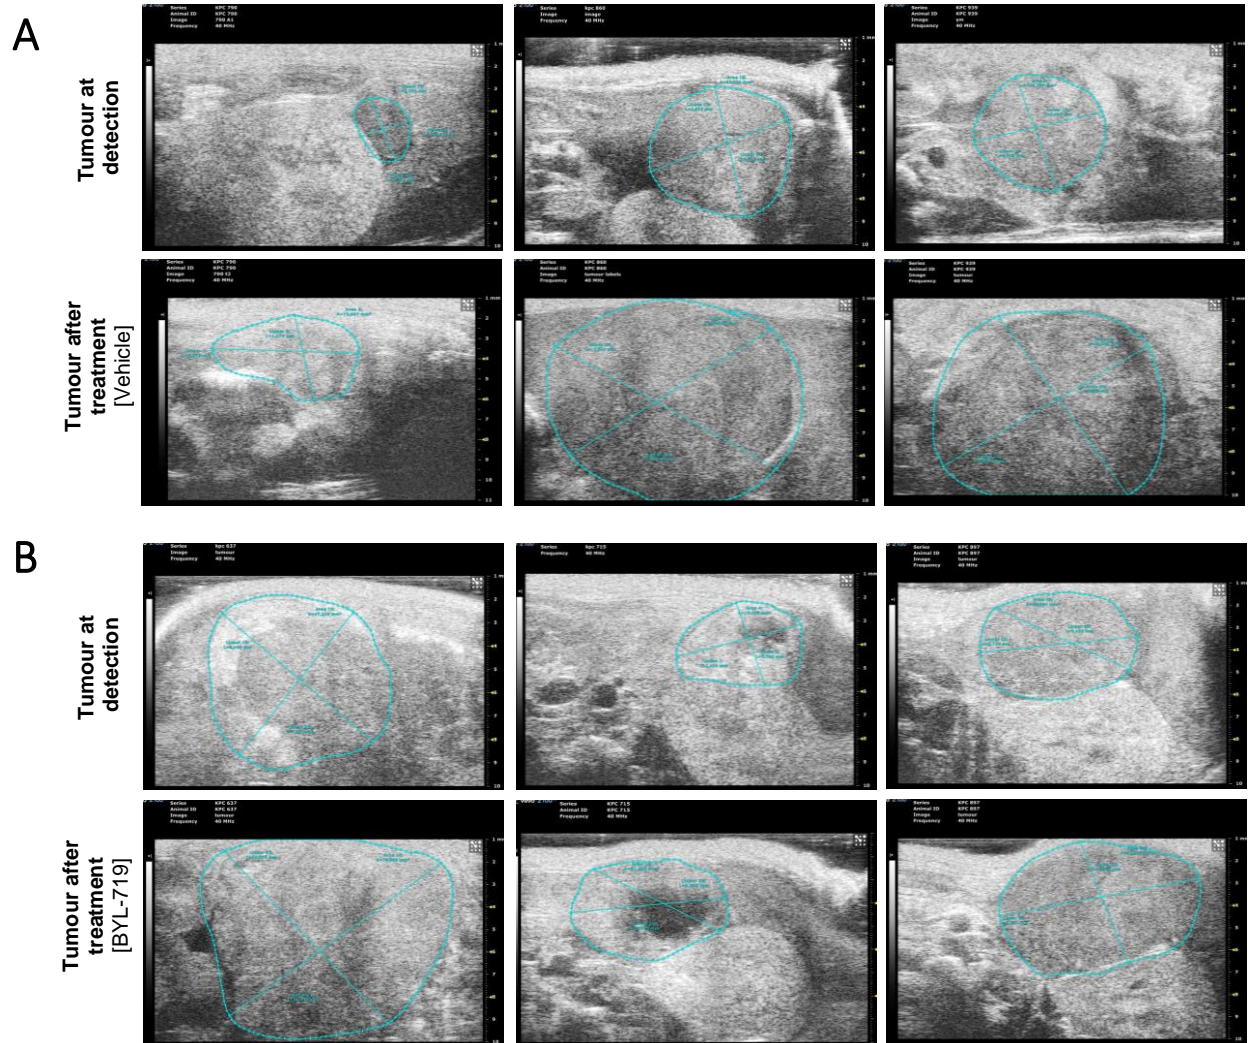

**C**

| Mouse ID | Initial Tumour volume (mm <sup>3</sup> ) | Final Tumour volume (mm <sup>3</sup> ) | Tumour fold change | Treatment |
|----------|------------------------------------------|----------------------------------------|--------------------|-----------|
| 637      | 435.523                                  | 656.492                                | 1.507              | BYL-719   |
| 715      | 62.045                                   | 97.522                                 | 1.572              | BYL-719   |
| 773      | 156.436                                  | 555.745                                | 3.553              | BYL-719   |
| 785      | 256.423                                  | 403.214                                | 1.572              | BYL-719   |
| 871      | 288.199                                  | 357.401                                | 1.240              | BYL-719   |
| 897      | 181.604                                  | 265.693                                | 1.463              | BYL-719   |
| 790      | 14.671                                   | 154.878                                | 10.557             | Vehicle   |
| 795      | 450.402                                  | 821.260                                | 1.823              | Vehicle   |
| 860      | 465.018                                  | 1045.508                               | 2.248              | Vehicle   |
| 894      | 179.036                                  | 458.345                                | 2.560              | Vehicle   |
| 939      | 93.553                                   | 620.745                                | 6.635              | Vehicle   |
| 977      | 435.572                                  | 1041.951                               | 2.392              | Vehicle   |

**Appendix Figure S12: Tumour progression by US imaging.** Representative US images of tumour progression in KPC mice treated with **A**, Vehicle and with **B**, BYL-719. **C**, Summary of tumour progression in the treated KPC mice.



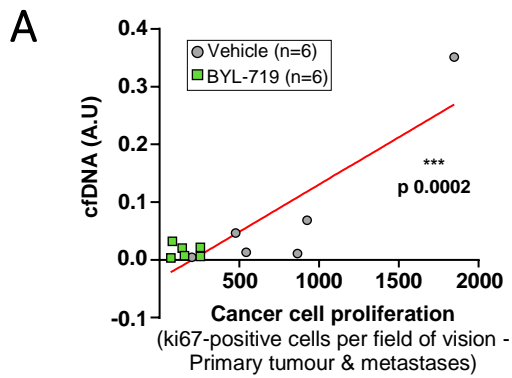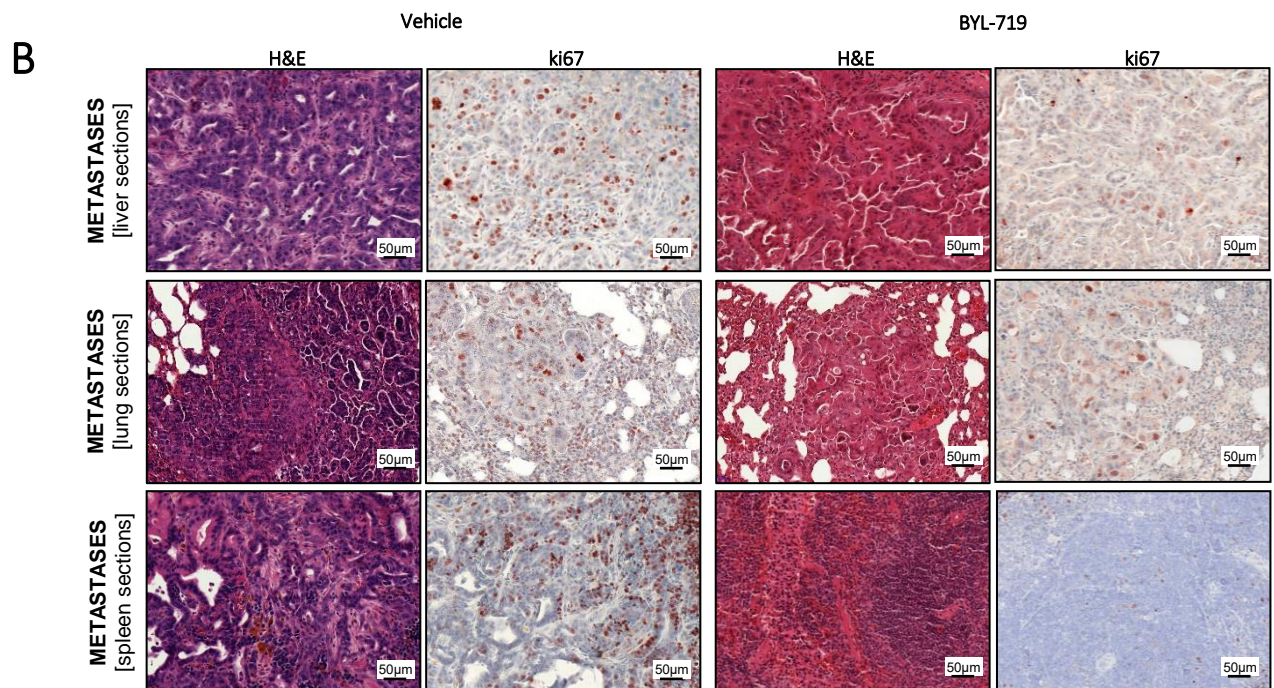

**Appendix Figure S13: Effects of PI3K $\alpha$  pharmacological inhibition on cfDNA and metastasis. A,** Significant correlation between cfDNA and cancer cell proliferation in treated KPC mice. **B,** Representative images of (H&E and Ki67 IHC) metastases in liver, lung and spleen of KPC mice treated with the vehicle or BYL-719. N is indicated. Mean  $\pm$  SEM (\*  $p < 0.05$ , \*\*  $p < 0.005$ , \*\*\*  $p < 0.0001$ ).

**A**

| Mouse ID | Treatment | Tumour location | Primary tumour | Histologic al Grade | Regional lymph nodes | Distant Metastases | Metastatic sites                         | Stage |
|----------|-----------|-----------------|----------------|---------------------|----------------------|--------------------|------------------------------------------|-------|
| B-637    | BYL-719   | Head            | T4             | G3                  | N1                   | M1                 | Liver, lung, peritoneum,                 | IV    |
| B-715    | BYL-719   | Head            | T2             | G2                  | N0                   | M0                 | N/A                                      | IB    |
| B-773    | BYL-719   | Head            | T4             | G3                  | N1                   | M1                 | Liver, peritoneum, ascites               | IV    |
| B-785    | BYL-719   | Tail            | T4             | G3                  | N0                   | M0                 | N/A                                      | III   |
| B-871    | BYL-719   | Tail            | T3             | G3                  | N0                   | M0                 | N/A                                      | III   |
| B-897    | BYL-719   | Head            | T4             | G3                  | N1                   | M1                 | Liver                                    | IV    |
| V-790    | Vehicle   | Tail            | T2             | G4                  | N0                   | M0                 | N/A                                      | IB    |
| V-795    | Vehicle   | Head            | T4             | G3                  | N1                   | M1                 | Liver, lung, spleen, peritoneum, ascites | IV    |
| V-860    | Vehicle   | Head            | T4             | G3                  | N1                   | M1                 | Liver, spleen, peritoneum, ascites       | IV    |
| V-894    | Vehicle   | Tail            | T4             | G4                  | N1                   | M1                 | Liver, spleen, peritoneum, ascites       | IV    |
| V-939    | Vehicle   | Head            | T4             | G4                  | N1                   | M1                 | Liver, lung, peritoneum, ascites         | IV    |
| V-977    | Vehicle   | Tail            | T4             | G4                  | NX                   | M1                 | Liver, peritoneum                        | IV    |

**Primary Tumour (T)**  
 TX Primary tumour cannot be assessed  
 T0 No evidence of primary tumour  
 Tis Carcinoma in situ\* includes PanIN III  
 T1 Tumour limited to the pancreas, less than 2mm in biggest dimension  
 T2 Tumour limited to the pancreas, more than 2mm in biggest dimension  
 T3 Tumour extends beyond the pancreas but without involvement of the celiac axis or main arteries  
 T4 Tumour involves celiac axis or main arteries (unresectable primary tumour)

**Regional Lymph Nodes (N)**  
 NX Regional lymph nodes cannot be assessed  
 N0 No regional lymph node metastasis  
 N1 Regional lymph node metastasis

**Distant Metastases (M)**  
 M0 No distant metastases  
 M1 Distant metastases

**Histological grade (G)**  
 GX cannot be assessed  
 G1 well differentiated  
 G2 moderately differentiated  
 G3 poorly differentiated  
 G4 undifferentiated

**B**

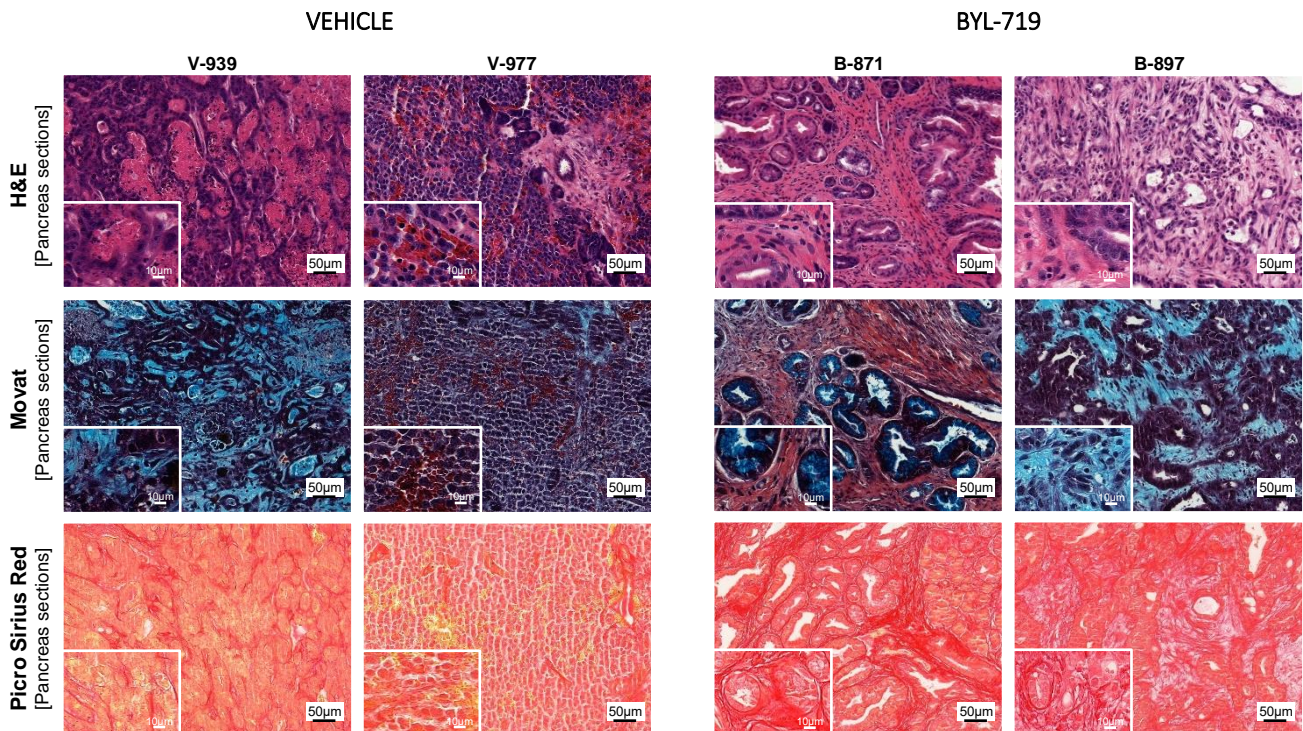

**Appendix Figure S14: Cancer staging and tumour histology of KPC mice treated with the vehicle and BYL-719. A, Cancer staging of KPC mice treated with the vehicle and BYL-719. B, Representative images of tumours in KPC mice. H&E, Movat’s Pentachrome and Picro Sirius Red staining.**

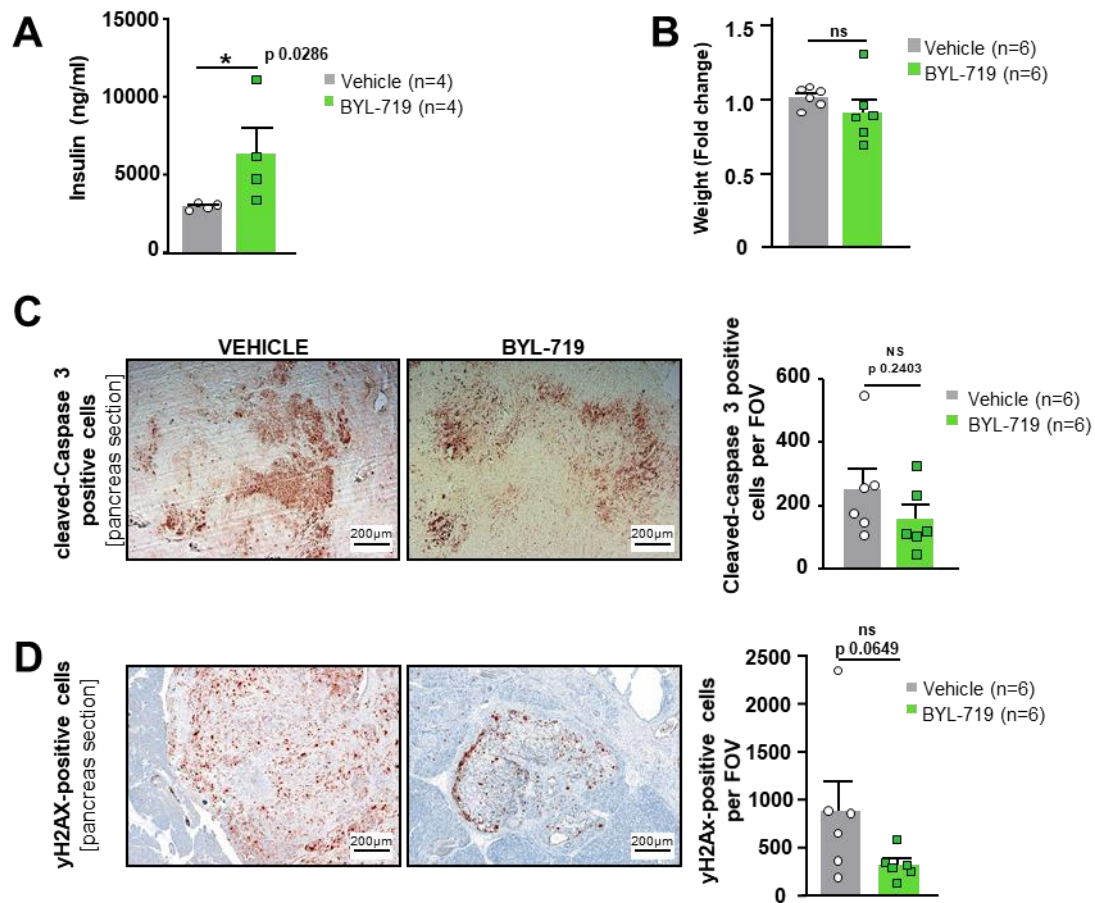

**Appendix Figure S15: Secondary effects of PI3K $\alpha$  pharmacological inhibition. A,** Insulin quantification on treated KPC. **B,** Quantification of weight change in treated KPC mice. **C,** Representative images and quantification of cleaved Caspase 3 and **D,**  $\gamma$ H2AX –positive cells in pancreatic sections of treated KPC mice. Mean +/- SEM (\*  $p < 0.05$ , \*\*  $p < 0.005$ , \*\*\*  $p < 0.0001$ )

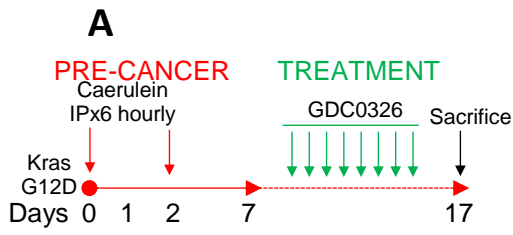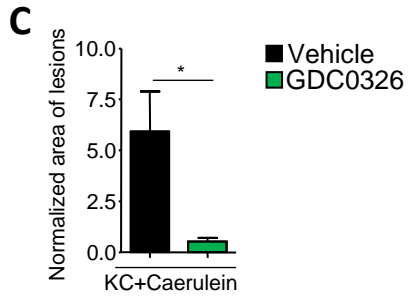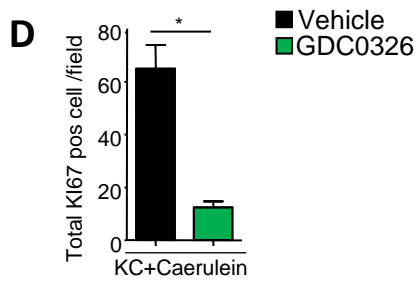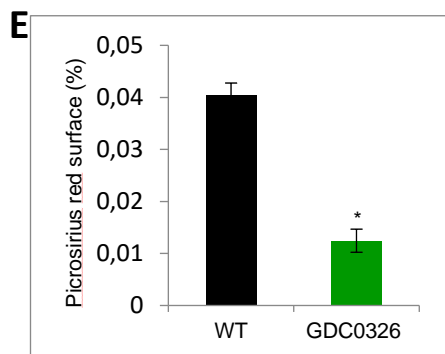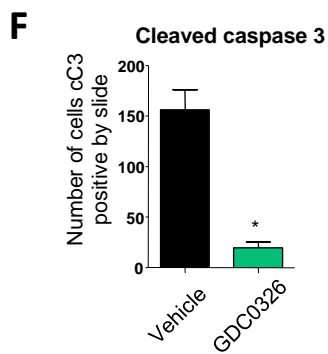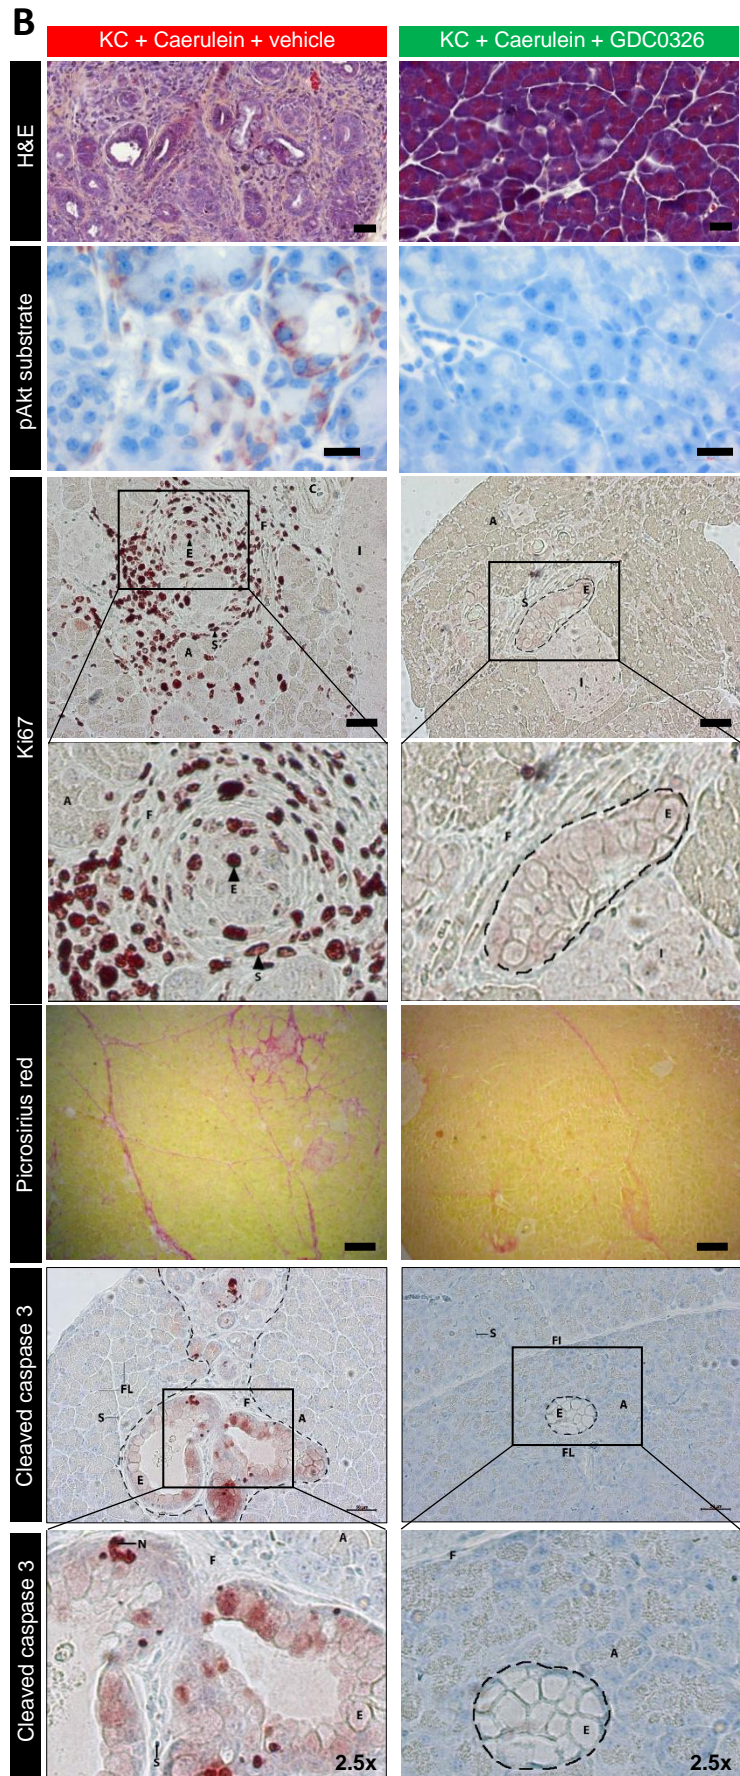

**Appendix Figure S16: Pharmacological inactivation of PI3K $\alpha$  reverses pre-cancer lesions and alterations of their stromal environment in an oncogenic KRAS context.** **A.** Dosage regimen of PI3K $\alpha$ -targeting drug (GDC0326 10mg/kg daily- blue arrows) in KC mice subjected to acute pancreatitis protocol with caerulein as described in Baer et al (black arrows). **B-F** IHC, stainings and quantification as indicated after 17 days; n=4 mice in each group. The surface of the lesion areas was quantified on two whole slides for each mouse, and normalised with the total area of the pancreas. Values are mean  $\pm$  SEM. T-Test: \*= $P < 0.05$  Representative images are shown. A: acinar cells, E: epithelial lesion; FL=fibroblasts, S: stroma, I: Langerhans islet

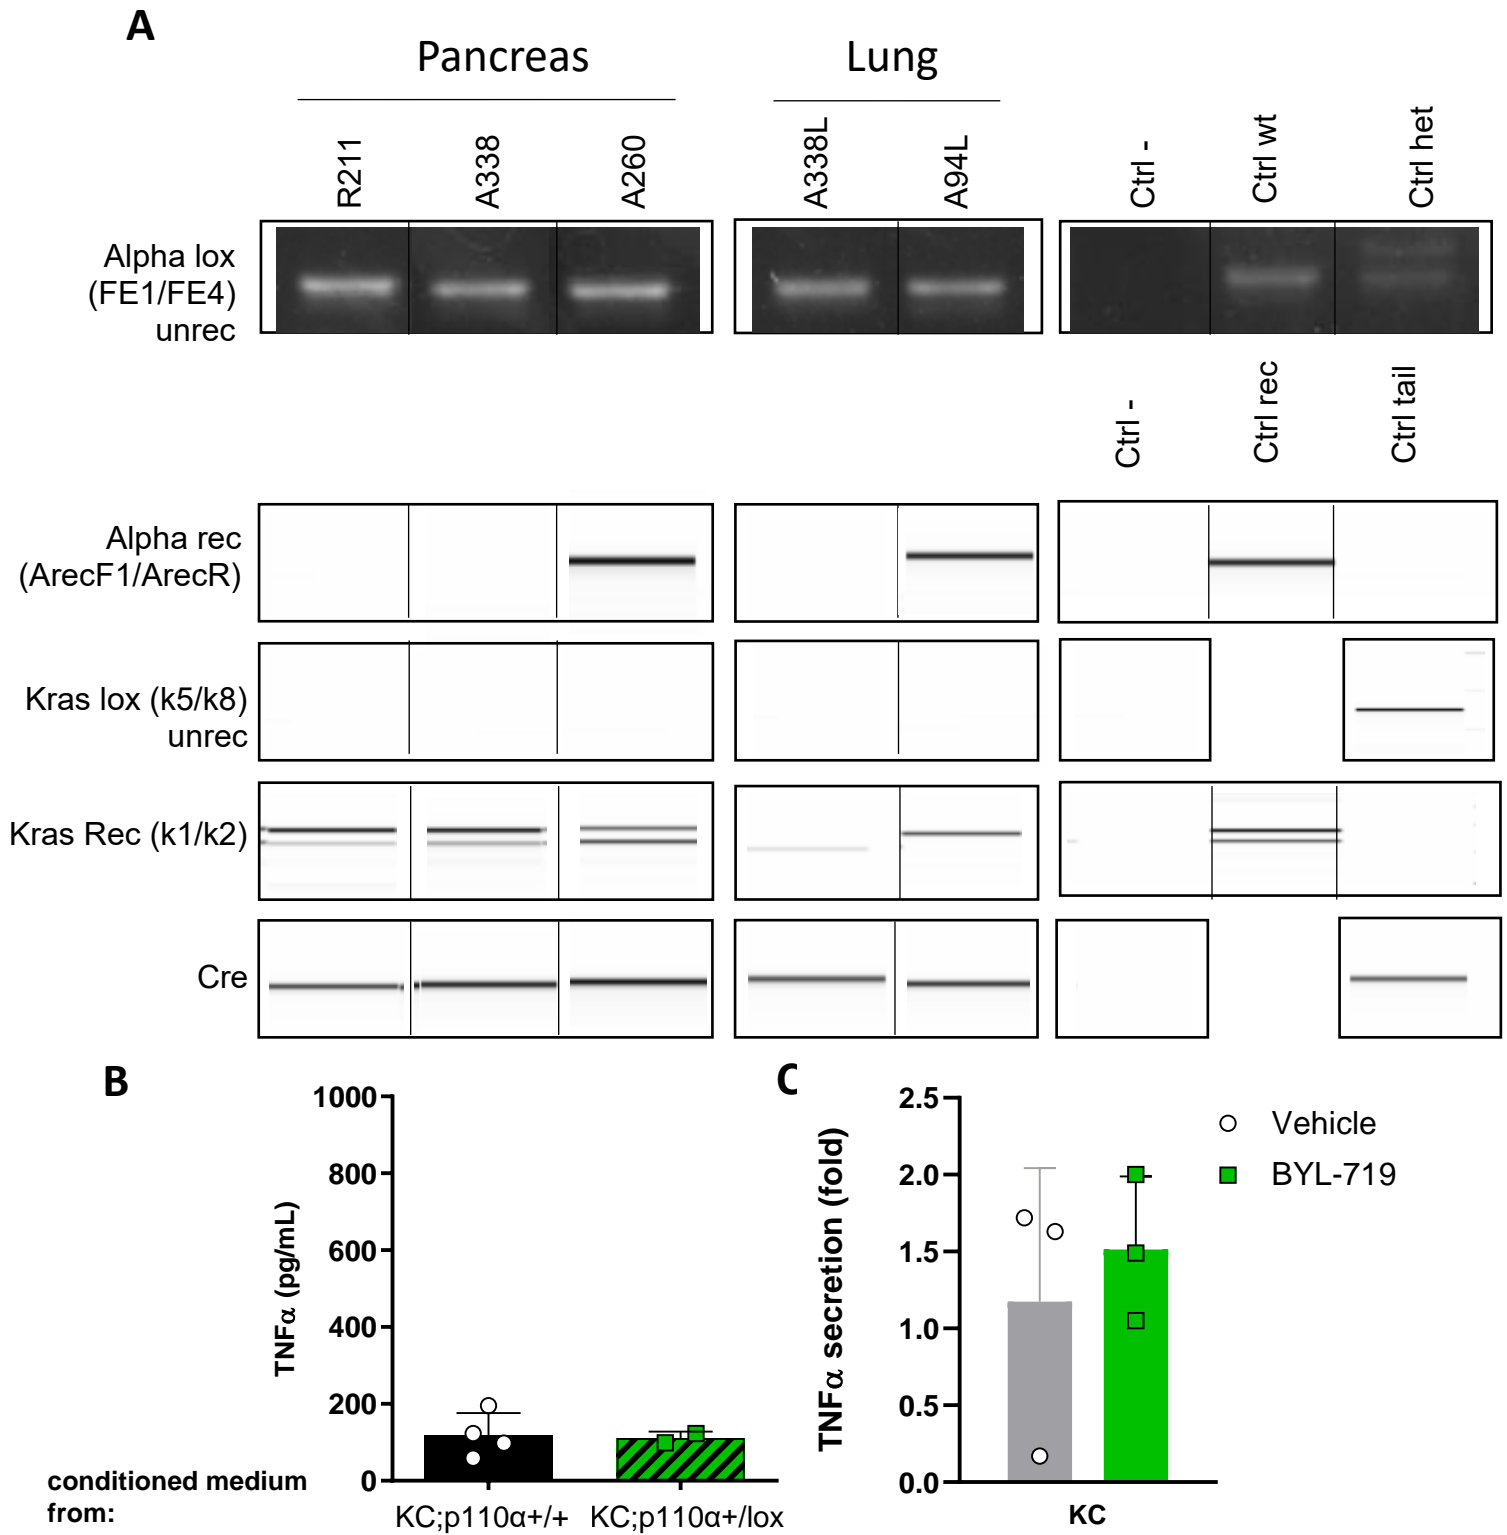

**Appendix Figure S17: Murine cell lines derived for the study. A, Genotyping. B, Quantification of secreted TNF $\alpha$  by tumour cells as indicated.**

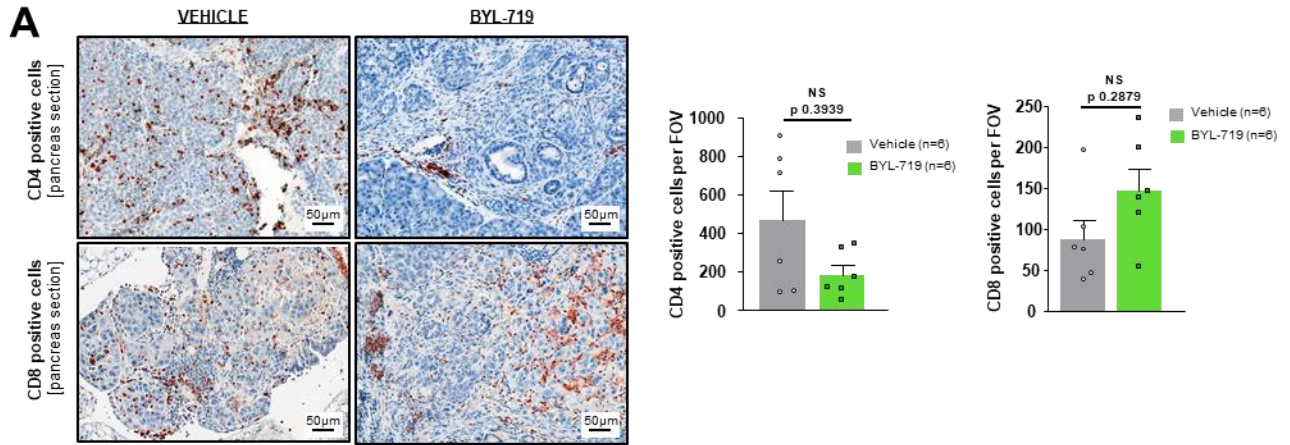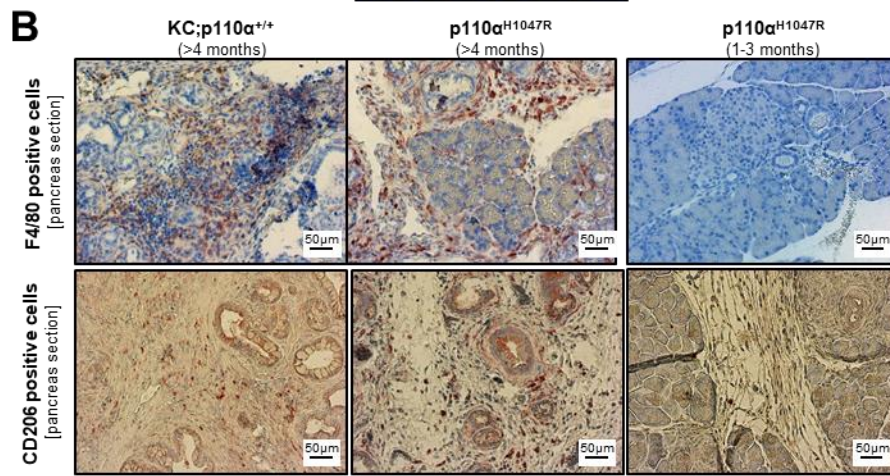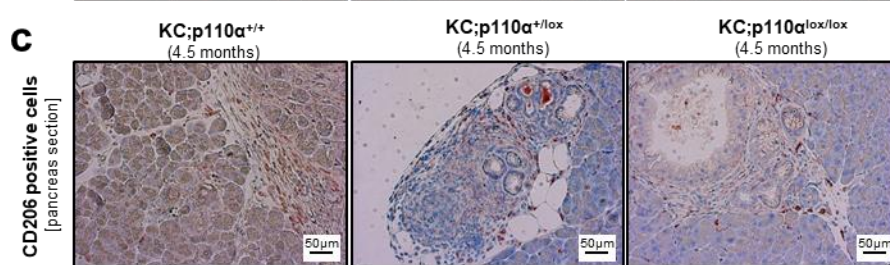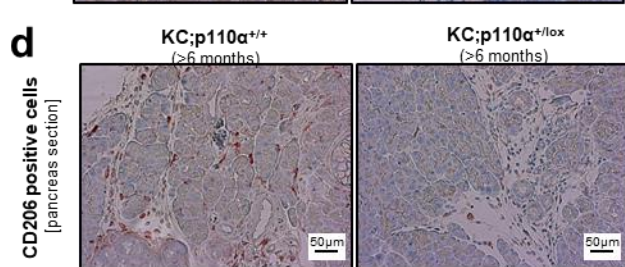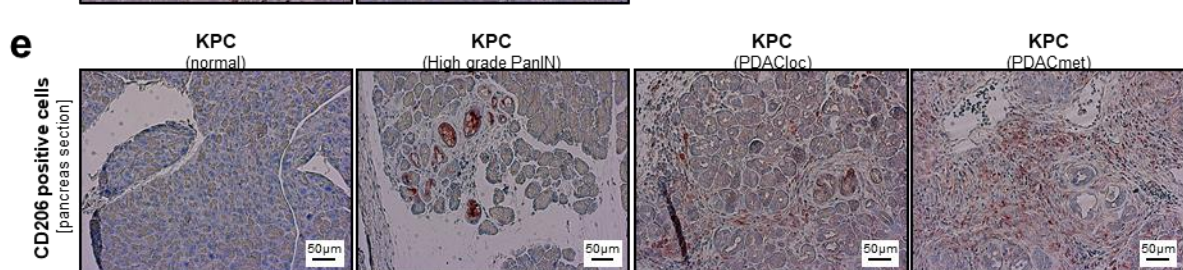

**Appendix Figure S18: Effects of PI3K $\alpha$  inhibition on the immune response.** **A**, Representative images and quantification of CD4 and CD8 positive cells in KPC mice treated with the vehicle or BYL-719. N is indicated. **B**, Representative images of F4/80 and CD206 positive cells in KC and oncogenic PI3K $\alpha$  mice at different ages. **C**, Representative images of CD206 positive cells around low-grade PanIN lesions in KC; p110 $\alpha^{+/+}$ , KC; p110 $\alpha^{+/lox}$  and KC; p110 $\alpha^{lox/lox}$  mice (4.5 months). **D**, Representative images of CD206 positive cells around high-grade PanIN lesions in KC; p110 $\alpha^{+/+}$  and KC; p110 $\alpha^{+/lox}$  (>6 months). **E**, Representative images of CD206 positive cells in KPC mice with normal, high-grade PanIN, PDACloc and PDACmet pancreas.



## Appendix Additional methods

### Detailed genotyping of mice

The compound mutants LSL-Kras<sup>G12D</sup>-LSL-p53<sup>R172H</sup>-Pdx1-Cre (KPC), LSL-KRAS<sup>G12D</sup>-Pdx1-Cre (KC), LSL-KRAS<sup>G12D</sup>-Pdx1-Cre-p110 $\alpha$ <sup>+/lox</sup> (KC;p110 $\alpha$ <sup>+/lox</sup>), KRAS<sup>G12D</sup>-Pdx1-Cre-p110 $\alpha$ <sup>+/lox</sup> (KC; p110 $\alpha$ <sup>lox/lox</sup>), LSL-KRAS<sup>G12D</sup>-LSL-p53<sup>R172H</sup>-Pdx1-Cre- p110 $\alpha$ <sup>+/lox</sup> (KPC; p110 $\alpha$ <sup>+/lox</sup>), LSL-KRAS<sup>G12D</sup>-LSL-p53<sup>R172H</sup>-Pdx1-Cre-p110 $\alpha$ <sup>+/lox</sup> (KPC; p110 $\alpha$ <sup>lox/lox</sup>) were obtained through breeding. Littermates not expressing Cre were used as controls. Genotyping was performed as described in (Baer *et al*, 2014; Hingorani *et al*, 2005; Therville *et al*, 2019) and analysed with the Fragment Analyzer Systems (AATI) DNA Analysis Kits dsDNA 910 Reagent kit, 35-1500bp (AATI). The genotyping of p53 allele uses T035- 5'-CTTGGAGACATAGCCCACTACTG-3' / T036 - 5'-AGCTAGCCACCATGGCTTGAGTAAGTCTGCA-3' / T037 - 5'-TTACACATCCAGCCTCTGTGG-3'- Annealing temperature: 60°C – amplicon size for WT: 166bp, for LSL-p53R172H: 270bp. Animal sample size was calculated using a power analysis in order to obtain statistically significant results from ki67 (n=5, p $\leq$ 0.02) and CD206 (n=6, p $\leq$ 0.05) immune staining (Table EV5).

### Detailed protocol for primary murine cancer cell isolation and culture

Organs were dissected using a scalpel in DMEM containing 200 U/ml of collagenase (Sigma C6885), incubated for 20 minutes in a water bath at 37°C under agitation. After washing, the cell suspension was resuspended in 10% DMEM FBS, filtered through a 100  $\mu$ m sieve and seeded in a 10-cm cell dish. After 7 passages, genotyping was carried out (Appendix Figure S17) with confirmed recombination of KRAS (PCR for detection of unrec (positive control: R211 cell line). LSL-KRASG12D allele: K005 5'-AGCTAGCCACCATGGCTTGAGTAAGTCTGCA-3' / K008 5'-TCCGAATTCAGTGACTACAGATGTACAGAG-3' – annealing temperature: 55°C - size of amplicon: 300bp; PCR for detection of recombined LSL-KRASG12D: K001 5'-GTCTTTCCCCAGCACAGTGC-3' / K002: 5'-CTCTTGCCTACGCCACCAGCTC-3' - annealing temperature: 61°C - size of amplicon: doublet at 554bp) without (R211, A338, A338L cell lines) or with *Pik3ca* gene recombination (A260, A94L cell lines) (PCR for detection of loxed *Pik3ca*

gene: FE1-5'-GGATGCGGTCTTTATTGTC-3' / FE4- 5'-TGGCATGCTGCCGAATTG-3' - annealing temperature: 59°C - amplicon size for WT: 640bp, for unrec. lox : 708 bp; PCR for detection of rec *Pik3ca* gene : aRecF1 5'-GGGGACAGTAGGAGGATGGT-3' / aRecR 5'-TGGCATTCCAGAGCCAAGC-3' - annealing temperature: 65°C - amplicon size : 812bp); it should be noted that recombination is driven by Cre expression in pancreatic lineage (Pdx1-cre: H06: 5'-TGCCACGACCAAGTGACAGCAATG-3'; H07 5'-GACCAGAGTCATCCTTAGCGCCG-3' – annealing temperature: 65°C - amplicon size: 580bp). Source data of cell genotyping is available. Tumorigenicity of A338 and A260 cell lines was verified by injection ( $7.5 \times 10^4$  or  $1.25 \times 10^5$  cells) in Nude and NSG mice. Cells were passaged several times before experiments to avoid stromal cell contamination.

### **Detailed Cell culture**

All cells were cultured in DMEM (Dulbecco's Modified Eagle Medium), 4.5 g of glucose supplemented with 10% foetal bovine serum (FBS), 1% L-glutamine, 1% penicillin/streptomycin and 0.01% plasmocin, except for HL-60, NOMO-1 and PC3 cultured in RPMI (Roswell Park Memorial Institute) supplemented as described previously or HPNE hTERT that were cultured in 75% DMEM without glucose/25% medium M3 Base supplemented with 5% FBS, 10 ng/ml human recombinant EGF, 5.5 mM D-glucose (1g/L) and 750 ng/ml puromycin or HPDE cells cultured in keratinocyte serum-free (KSF) medium supplemented by epidermal growth factor and bovine pituitary extract. Cells were cultured at 37°C in a humidified 5% CO<sub>2</sub> atmosphere. AML: Acute myeloid leukaemia; WT: Wild type. Cells were checked monthly by PCR for mycoplasma infection using the following primers: Forward: GCTGTGTGCCTAATACATGCAT and Reverse: ACCATCTGTCACTCTGTTAACCTC. Genomic DNA from a mycoplasma-infected cell line was used as a positive control.

### **Detailed methods in cell assays**

#### **Cytotoxicity assay**

Cells were seeded in 96-well plates. Twenty-four hours later, they were treated with a dose range of  $\alpha$ -selective,  $\beta$ -selective,  $\beta/\delta$ -selective,  $\gamma$ -selective or pan PI3K inhibitors at 0.1, 1 and 10  $\mu$ M,

respectively, in 10% FBS medium or the vehicle (DMSO 0.1%). For IC50 value, see Table EV4B. Three day post-dose, living cells were stained using MTT for adherent cell lines or MTS for acute myeloid cell lines. Control cells were treated with 0.1% DMSO and considered as 100% living cells. Each condition was conducted in triplicate and each experiment was performed at least three times.

### **Apoptosis**

Cells ( $5 \times 10^3$ ) were seeded in 96-well plates. Twenty-four hours after seeding, cells were treated with  $\alpha$ -selective,  $\beta$ -selective,  $\beta/\delta$ -selective,  $\gamma$ -selective or pan PI3K inhibitors at 1 and 10  $\mu\text{M}$ , in 10% FBS medium or the vehicle (DMSO 0.1%) and were marked for apoptotic cells with IncuCyte® Annexin V (red) according to the manufacturer's protocols (Sartorius). Confluence and fluorescence were monitored every 2 h with IncuCyte S3 (Sartorius). Control cells were treated with 0.1% DMSO. Apoptotic cell surface was normalized with confluence and the fold change was calculated by comparing the treatments to the vehicle condition. Each condition was conducted in triplicate and each experiment was performed three times.

### **Motility assay**

Cells ( $1 \times 10^5$ ) were seeded in 24-well plates. Scratching was carried out at confluence using a pipette tip and cells were treated with  $\alpha$ -selective and pan-PI3K inhibitors at 0.01, 0.1 or 1  $\mu\text{M}$ , or the vehicle (0.01% DMSO). Cells were examined microscopically after 8 h and 24 h, and the scratch surface was analysed using ImageJ software. Control cells were treated with 0.01% DMSO. Five photographs were taken per condition and each experiment was carried out at least three times.

### **Migration assay**

Cells ( $5 \times 10^4$ ) were seeded in the upper compartment of Boyden chamber inserts in serum-free DMEM. Four hours after seeding, complete DMEM was added to the lower compartment to trigger migration. Cells were treated with  $\alpha$ -selective,  $\beta$ -selective,  $\beta/\delta$ -selective,  $\gamma$ -selective and pan-PI3K inhibitors at 0.1 and 1  $\mu\text{M}$ , an FGFR inhibitor (AZD4547) at 2  $\mu\text{M}$ , TNF- $\alpha$  at 20 ng/mL or the vehicle (0.01% DMSO) in the lower and upper compartments. Twenty-four hours after treatment, cells were fixed with 3.7% formaldehyde for 20 minutes and then stained with crystal violet for 20 minutes. A

cotton swab was used to remove non-migrated cells from the insert. Migrated cells were analysed using ImageJ software. Control cells were treated with 0.01% DMSO. Ten photographs were taken per condition and each experiment was carried out at least three times.

### **Western blot**

Cells were scraped in cold lysis buffer (50mM Tris at pH 7.4, 150 mM NaCl, 1% Triton, 1 mM EDTA, 2 mM DTT, 2 mM NaF, 4 mM Na orthovanadate and a protease inhibitor cocktail provided by Roche). Fifty micrograms of proteins were separated by SDS-PAGE and transferred to a PVDF membrane. Membranes were saturated in TBS (50 mM Tris, 150 mM NaCl)/0.1% Tween 20 (TBST)/5% milk and incubated with the primary antibody (Table EV4C). Membranes were washed with TBST and incubated with the corresponding secondary antibody. Membranes were washed with TBST and immunocomplexes were visualised using ECL RevelBlot Plus (Ozyme) by autoradiography.

### **RNA extraction and RT-qPCR**

The cell pellet was resuspended in Trizol (Invitrogen). Chloroform was added and the suspension was centrifuged for 10 minutes at 18,000 g at 4°C. The aqueous phase was isolated, completed with isopropanol then centrifuged for 10 minutes at 18,000 g at 4°C. The pellet was washed with cold 80%, 83% EtOH. The suspension was centrifuged for 5 minutes at 18,000 g at 4°C and the pellet was dried and then resuspended in RNase-free water. 1 µg of extracted RNA was used to obtain cDNA using RevertAid H minus reverse transcriptase, random hexamers and the corresponding mix (ThermoScientific). Primers were all designed with Primer-BLAST (NCBI) and are listed in Table EV4D. qPCRs were produced using the SsoFast EvaGreen supermix (Bio-Rad). Expression was normalised with Actin primers and represented as fold change using the  $2^{-\Delta\Delta CT}$  formula. For the identification of epithelial or mesenchymal subtypes in pancreatic murine tumour cells, R211 has been defined as the reference cell line.

### **Cytokine measurement in cell supernatants (Q-Plex™ assay)**

The assay was performed according to the manufacturer's protocol. A Q-Plex™ assay (Quansys Biosciences, Q-Plex mouse cytokine Stripwells 16-plex assay) was carried out to measure the

concentration of 16 mouse cytokines in cell supernatants. The concentration was normalised with the number of living cells. R211, A338 and A260 were derived from primary tumours. A338L and A94L were isolated from lung metastases. All cell lines were passaged at least 15 times to avoid stromal contamination. KC;p110 $\alpha^{+/+}$  (R211, A338, A338L) and KC;p110 $\alpha^{+/lox}$  (A260, A94L) cells ( $3 \cdot 10^6$ ) were seeded in 6-well plates with 10% FBS. On the following day, the medium was replaced by 2% FBS medium with or without the vehicle (0.01% DMSO) or 1  $\mu$ M BYL-719. After 2 days of treatment, the medium was replaced by a new medium with the same content. The cell supernatant was extracted after one day.

#### **Detailed PIP extraction and measurement by mass spectrometry**

Murine pancreatic tumour cells R211 were treated with or without the vehicle (0.01% DMSO), A66 1  $\mu$ M or BKM120 1  $\mu$ M for 15 minutes. The culture medium was quickly aspirated and cells were scraped in cold HCl 1M. The lysate was centrifuged for 5 minutes at 15,000 g at 4°C. The cell pellet was stored at -80°C until required for PIP extraction. Lipids were extracted and derivatised using TMS-diazomethane as previously described (Clark *et al*, 2011). Mass spectral analysis was performed on the LC-QqQ triple quadrupole mass spectrometer (LC-vcQQQ 6460 Agilent) equipped with positive mode electrospray ionisation as described above (Clark *et al*, 2011). Analyses were performed in Selected Reaction Monitoring detection mode (SRM) using nitrogen as collision gas. Finally, peak detection, integration and quantitative analysis were performed using MassHunter QqQ Quantitative analysis software (Agilent Technologies VersionB.05.00) and Microsoft Excel software. Data were processed using QqQ Quantitative (vB.05.00) and Qualitative analysis software (vB.04.00).

#### **Details of the IHC procedure (human and murine samples)**

Tissues were fixed in 10% neutral-buffered formalin (Sigma HT501128) and embedded in paraffin. For pathological analysis, the tissues were serially sectioned (4  $\mu$ m), and then stained with haematoxylin eosin. All tissues were analysed in blinded fashion. Histopathological scoring of pancreatic lesions was performed on sections 100  $\mu$ m apart, with 3 sections per pancreas. IHC was performed and quantified as described in (Baer *et al*, 2014).

Immunostaining was conducted on formalin-fixed, paraffin-embedded tissues using standard methods with listed antibodies (Table EV4E). After rehydration, slides were permeabilised for 10 min in 0.1% Triton/1% PBS; they were then subjected to heat-antigen retrieval in citrate buffer or to enzymatic antigen retrieval in Proteinase K (Dako S3020), the latter was only applied for F4/80 immunostaining. Slides were incubated for 20 min with Protein Block (Dako X0909) to prevent non-specific binding. Sections were subsequently incubated overnight or for 1 h at room temperature\* with primary antibodies (Table EV4E), washed, incubated for 15 min with 3% H<sub>2</sub>O<sub>2</sub> and then rewashed. Most antibodies were detected using the HRP-Detection Reagent SignalStain<sup>®</sup>Boost (CST 8114) and developed through AEC (Dako K3464) incubation; anti-F4/80 antibody was revealed using the VECTASTAIN<sup>®</sup> Elite<sup>®</sup> ABC HRP Kit (VECTOR Laboratories PK-6100). All slides were counterstained with haematoxylin and mounted using Glycergel Mounting Medium (Dako C0563). Quantifications were randomly performed in at least 5 large-scale images in the area indicated.

We followed the manufacturers' protocol for additional staining with the Picro Sirius Red Stain Kit (ab150681) and Movat's Pentachrome Stain Kit (Modified Russell-Movat ab245884).

## Appendix supplemental references

- Baer R, Cintas C, Dufresne M, Cassant-Sourdy S, Schönhuber N, Planque L, Lulka H, Couderc B, Bousquet C, Garmy-Susini B, *et al* (2014) Pancreatic cell plasticity and cancer initiation induced by oncogenic Kras is completely dependent on wild-type PI 3-kinase p110 $\alpha$ . *Genes Dev* 28: 2621–2635
- Clark J, Anderson KE, Juvin V, Smith TS, Karpe F, Wakelam MJO, Stephens LR & Hawkins PT (2011) Quantification of PtdInsP3 molecular species in cells and tissues by mass spectrometry. *Nat Methods* 8: 267–272
- Hingorani SR, Wang L, Multani AS, Combs C, Deramaudt TB, Hruban RH, Rustgi AK, Chang S & Tuveson DA (2005) Trp53R172H and KrasG12D cooperate to promote chromosomal instability and widely metastatic pancreatic ductal adenocarcinoma in mice. *Cancer cell* 7: 469–83
- Therville N, Arcucci S, Vertut A, Ramos-Delgado F, Da Mota DF, Dufresne M, Basset C & Guillermet-Guibert J (2019) Experimental pancreatic cancer develops in soft pancreas: novel leads for an individualized diagnosis by ultrafast elasticity imaging. *Theranostics* 9: 6369–6379
